|                                                                                                                                        |    |
|----------------------------------------------------------------------------------------------------------------------------------------|----|
|                                                                                                                                        | 1  |
| Kislev N <sup>1*</sup> , Mor-Yossef Moldovan L <sup>1*</sup> , Barak R <sup>1</sup> , Egozi M <sup>1</sup> , Benayahu D <sup>1</sup> . | 2  |
| <b>MYH10 governs adipocyte function and adipogenesis through its interaction with GLUT4</b>                                            | 3  |
| <br>                                                                                                                                   |    |
| 1. Department of Cell and Developmental Biology, Sackler School of Medicine, Tel Aviv University,                                      | 4  |
| Tel Aviv 6997801, Israel                                                                                                               | 5  |
|                                                                                                                                        | 6  |
| Correspondence                                                                                                                         | 7  |
| Prof. Dafna Benayahu                                                                                                                   | 8  |
| Department of Cell and Developmental Biology,                                                                                          | 9  |
| Sackler School of Medicine,                                                                                                            | 10 |
| Tel Aviv University,                                                                                                                   | 11 |
| Tel Aviv 6997801, Israel                                                                                                               | 12 |
| E-mail: <a href="mailto:dafnab@tauex.tau.ac.il">dafnab@tauex.tau.ac.il</a>                                                             | 13 |
| *Equal contribution                                                                                                                    | 14 |
| <br>                                                                                                                                   |    |
| <b>Data Availability Statement</b>                                                                                                     | 15 |
| The data that support the findings of this study are available from the corresponding author                                           | 16 |
| upon reasonable request                                                                                                                | 17 |

## Abstract

18

Adipocyte differentiation is dependent on cytoskeletal remodeling processes that determine and 19 maintain cellular shape and function. In turn, cytoskeletal proteins contribute to the filament-based 20 network responsible for controlling adipocyte's shape and promoting the intracellular trafficking of 21 key cellular components. Currently, our understanding of these mechanisms remains incomplete. In 22 this study, we identified the non-muscle myosin 10 (MYH10) as an important regulator of 23 adipogenesis and adipocyte function through its interaction with the insulin dependent, Glucose 24 transporter 4 (GLUT4). MYH10 depletion in preadipocytes resulted in impaired adipogenesis, with 25 knockdown cells exhibiting disrupted morphology and reduced molecular adipogenic signals. MYH10 26 was shown to be in complex with GLUT4 in adipocytes, an interaction regulated by insulin induction. 27 The missing adipogenic capacity of MYH10-KD cells was restored when they uptook GLUT4 vesicles 28 up from neighbor wild-type cells in a co-culture system. Our results provide the first demonstration 29 that MYH10 interacts with GLUT4 in cells and adipose tissue through the insulin pathway. The 30 signaling cascade is regulated by the protein kinase C  $\zeta$  (PKC $\zeta$ ), which interacts with MYH10 to modify 31 the localization and interaction of both GLUT4 and MYH10 in adipocytes as PKC $\zeta$  inhibition resulted in 32 reduced GLUT4 and MYH10 translocation and interactions. Overall, our study establishes MYH10 as 33 an essential regulator of GLUT4 translocation, affecting both adipogenesis and adipocyte function, 34 highlighting its importance in future cytoskeleton-based studies in adipocytes. 35

**Keywords:** MYH10, GLUT4, PKC $\zeta$ , adipogenesis, cytoskeleton organization, insulin signaling

36

## Introduction

37

The process of adipocytes differentiation is termed adipogenesis. It is a well-coordinated process 38 orchestrated by morphological and molecular changes in the cells and their niche. Specific physical, 39 molecular, and chemical pathways promote the commitment of mesenchymal cells to preadipocytes 40 and later to mature adipocytes through a series of sequential inter-dependent events<sup>1,2</sup>. During 41 adipogenesis, the cells undergo substantial morphological changes that are crucial for their 42 commitment to a lineage-specific fate<sup>3,4</sup>. These changes are organized by cytoskeletal components 43 responsible for determining and maintaining cellular shape and function and are a prerequisite for 44 the induction of adipogenic signaling<sup>5-9</sup>. In addition, cytoskeletal proteins are also involved in the 45 terminal differentiation phase and the insulin signaling pathway, where they are needed as a filament- 46 based network for translocation of glucose transporter 4 (GLUT4) and other related processes<sup>10-15</sup>. 47

GLUT4 is an insulin-dependent glucose transporter expressed mainly in the brain, muscle cells, and 48 adipocytes<sup>16,17</sup>. Reduced GLUT4 translocation and reduced membranal expression, specifically in 49 adipose tissue, is associated with diabetes, insulin resistance, and lowered glucose sensitivity<sup>18,19</sup>. In- 50 vitro, GLUT4 expression is upregulated during adipogenesis, and knockdown of GLUT4 in 51 preadipocytes can interfere with their differentiation<sup>20,21</sup>. GLUT4 is packed in storage vesicles (GLUT4 52 storage vesicles: GSVs) that are found in the cytoplasm. Upon stimulation, these GSVs are 53 translocated to the cell membrane, where they uptake glucose<sup>16,17</sup>. The translocation process is highly 54 synchronized by a variety of kinases and cytoskeletal proteins that undergo rapid reorganization to 55 promote shuttling of GSVs to the cell membrane<sup>11,13,22</sup>. Some of the most significant cytoskeletal 56 components associated with GLUT4 translocation are myosins, where different types of myosins 57 interact with both the actin network and the GSVs to facilitate the shuttling process<sup>23-29</sup>. 58

Non-muscle myosin II (NMII) proteins are vital cytoskeletal components that are ubiquitously 59 expressed in a variety of cell types. The three NMII mammalian paralogs (A-C), encoded by the MYH9, 60 MYH10, and MYH14 genes respectively, differ in their expression profiles, and play both unique and 61 overlapping roles<sup>30,31</sup>. These proteins interact with actin filaments and are associated with 62 intracellular forces, organelle shuttling, cell adhesion, directional motility, and morphogenesis<sup>30,32</sup>. 63 The NMII proteins also play a role in the cytoskeletal organization of stress fibers and anchor the cells 64

to the substrate<sup>33,34</sup>. However, despite extensive research addressing the roles of NMII, it remains 65 unclear at the conceptual level how the specific expression profile of MYH10 in individual cells is linked 66 to cell physiology. While a variety of myosin types are implicated in adipocyte metabolism, little is 67 known about the role of MYH10 in adipocytes and adipogenesis. Previous studies have reported that 68 MYH10 is expressed in adipocytes<sup>29,35–38</sup>, and we have previously demonstrated the association of 69 reorganized actin filaments and other candidate proteins, including MYH10, in adipocyte 70 differentiation<sup>6</sup>. However, the mechanism of action and function of MYH10 in adipocytes has never 71 been studied. 72

Here, we generated a knockdown model of MYH10 in preadipocytes in order to examine its effects 73 on adipogenesis and adipocyte function. The results identify MYH10 as a possible regulator of 74 adipogenesis in 3T3-L1 cells. They also reveal the presence of MYH10 in a complex with GLUT4 that is 75 regulated by insulin. The interaction with GLUT4 was proven crucial for adipogenesis as the lack of 76 adipogenic capacity of MYH10 knockdown cells was restored by transportation of GLUT4 from 77 neighboring cells. Moreover, our results indicate that the MYH10:GLUT4 complex is regulated by PKC $\zeta$ , 78 a protein kinase C associated with insulin signaling and cytoskeleton reorganization<sup>39,40</sup>. This is the 79 first study to show the importance of MYH10 in adipogenesis and adipocyte function and can serve 80 as the foundation for future MYH10 based studies in adipocytes. 81

## **Methods and Materials** 82

Animals: Epididymal visceral adipose tissues were taken from C57bl/6J mice and used as fresh and 83 frozen tissues for further procedures. The mice were kept in a conventional facility with 12 h 84 light/dark cycles and were fed with standard chow and provided water ad libitum. Animal care and 85 experiments were in accordance with the guidelines of the IACUC Approval (01-21-044). 86

Cell lines: Mouse embryonic 3T3-L1 preadipocytes (American Type Culture Collection) were 87 cultured and differentiated as was previously described<sup>41</sup>. For insulin induction, differentiated 3T3-L1 88 cells were incubated in a Dulbecco's modified Eagle's medium (DMEM) without glucose for one hour 89 (Biological Industries, Israel), and then replaced with a GM with and without 5 $\mu$ g/ml insulin for 5-30 90 minutes. To inhibit PKC $\zeta$  activity, a myristoylated pseudo-substrate inhibitor for PKC $\zeta$  (Santa Cruz , SC 91 -397537) was added at 50 $\mu$ M to the starvation and induction phases of insulin induction. 92

Lentivirus production and transduction: Lentiviruses were produced as was previously described<sup>42</sup>. 93  
The pLenti-myc-GLUT4-mCherry expressing lentivirus plasmid was a gift from Weiping Han (Addgene 94  
plasmid # 64049; <http://n2t.net/addgene:64049>; RRID: Addgene\_64049)<sup>43</sup>. The MYH10 pCMV- 95  
GFPH2B lentiviral plasmid (Clone ID; TRCN0000110555) was a gift from Chen Luxenburg, Tel Aviv 96  
University, Tel Aviv, Israel.<sup>44</sup> The lentivirus particles were produced by the transfection of cultured 97  
HEK293FT cells (Invitrogen; R70007) with the lentivirus expression plasmid and helper plasmids [pLP1, 98  
pLP2, and VSV-g (Invitrogen)]. The supernatant was collected after one and 2-days post-transfection. 99  
Cultured 3T3-L1 preadipocytes were infected control (Scr; H2B-GFP) or gene-specific lentiviruses with 100  
Polybrene (Sigma-Aldrich) at a final concentration of 100µg/ml. 101

Co-culturing: For the GLUT4<sup>+</sup>: MYH10-KD 3T3-L1 co-culture, GLUT4<sup>+</sup> cells were seeded first, and 102  
after one day, the MYH10-KD cells were added to all wells. The culture was then differentiated as 103  
described. The PKH26:MYH10-KD co-cultures 3T3-L1 cells were labeled with 0.5λ PKH26 Fluorescent 104  
Cell Linker Kit (Sigma-Aldrich); the GFP cells were added after one day. 105

Immunofluorescence staining: Immunofluorescence staining was performed as described in Mor- 106  
Yosef Moldovan et al<sup>6</sup>. Shortly, the cells were fixed with a 4% paraformaldehyde solution, 107  
permeabilized with 0.5% Triton in 1% TBST, and then blocked with a blocking solution (1% TBST 108  
containing 1–2% normal goat serum and 1% BSA). Next, the cells were incubated overnight with 109  
primary MYH10 (Santa Cruz; SC-376942) and GLUT4 (Santa Cruz; SC-53566) antibodies, washed, and 110  
incubated with secondary antibodies, Cy3-anti-mouse (115-165-003; Jackson ImmunoResearch 111  
Laboratories), Alexa Fluor 555 anti-Mouse IgG1 (Invitrogen; A-21127), and Alexa Fluor 488 anti- 112  
Mouse IgG2b (Invitrogen; A-21141) for one additional hour. F-actin filaments were stained with 113  
fluorescein isothiocyanate labeled phalloidin (P5282; Phalloidin-FITC; Sigma-Aldrich). The stained 114  
coverslips were mounted on slides with Fluoroshield™ mounting medium containing 4', 6-diamidino- 115  
2-phenylindole (DAPI). Images were acquired by a confocal microscope (Leica SP8; Leica, Wetzlar, 116  
Germany) and a fluorescence microscope (Nikon, Eclipse Ci). 117

Whole-mount staining: Adipose tissue whole-mount staining was performed as previously 118  
described<sup>45</sup>. Briefly, isolated murine epididymal adipose tissues were fixated in 1% paraformaldehyde 119  
in 24-wells plates. The tissues were then washed and blocked with a blocking buffer (PBS-0.3T with 120

5% normal goat serum). Blocked tissues were incubated overnight with primary MYH10 (Santa Cruz; 121 SC- 376942) and GLUT4 (Santa Cruz; SC-53566) antibodies. Next, the tissues were incubated with 122 secondary antibodies, Alexa Fluor 555 anti-Mouse IgG1 (Invitrogen; A-21127), and Alexa Fluor 488 123 anti-Mouse IgG2b (Invitrogen; A-21141) and washed again before adding the Fluoroshield™ mounting 124 medium DAPI. Images were acquired by a confocal microscope (Leica SP8; Leica, Wetzlar, Germany). 125

Image processing and analysis tools: ImageJ was used to analyze and process the 126 immunofluorescence pictures. **Cytoskeleton quantification:** MYH10 filaments distribution analysis 127 was done as previously described<sup>6</sup>. Shortly, the images were analyzed with the FIJI ImageJ software 128 (NIH, Bethesda, MD) using two plugins. OrientationJ<sup>46</sup> was used to quantify the coherency of the cells, 129 and the Ridge detection plugin<sup>47,48</sup> was used to calculate the length and number of junctions of each 130 cell. **Membranal/cytoplasmatic ratio quantification:** Membranal/cytoplasmatic and 131 cortical/cytoplasmatic ratios were calculated as previously described<sup>49</sup>. The mean membranal and 132 cytoplasmatic intensities were extracted by using the method. The mean membranal intensity was 133 divided by the mean membranal intensity to extract the ratio of cells. 134

Live microscopy: All live imaging was performed using EVOS FL Auto 2 microscope (Invitrogen). 135 **Adhesion assay:** Suspended 3T3-L1 cells were seeded in six wells and were immediately transferred 136 to the EVOS microscope. Phase-contrast images were taken at 3, 15- and 33 minutes post-seeding. 137 Fiji ImageJ's Trainable Weka segmentation plugin<sup>50</sup> was used to separate the cells and background in 138 each image. Every cell in each field was marked, and its area was calculated using ImageJ. **Migration** 139 **assay:** The migration of cells was assessed by manual track of single cells using time-lapse images. 140 The cells were observed for three hours, and images were taken at ten minutes intervals. Trajectories 141 of the migration paths were calculated using the manual cell tracker plugin in ImageJ. Each cell 142 nucleus in the image sequence was manually marked for each frame. Then the created trajectories 143 were used to generate the vectors and calculate the motility data. Accumulative distance and average 144 speed were calculated for each trajectory. **Wound healing assay:** Cultured confluent (90%) 145 monolayer of 3T3-L1 preadipocytes were scratched with a tip. The cells were then observed under 146 the EVOS microscope and measured at 0, 4, 8, and 12 hours and at the time of closure. The relative 147 closure gap was calculated as the ratio of the current gap relative to the gap at the starting point. The 148 experiment was repeated three times for each group. 149

Adipogenesis assays: Images of cultured 3T3-L1 cells throughout differentiation were taken in order 150 to follow the cell's growth, morphology and LDs accumulation. **Level of adipogenesis:** The Level of 151 adipogenesis was calculated as previously described<sup>51</sup>. Shortly, Stitched phase-contrast x40 images 152 of differentiated cultures were taken after 21 days post-adipogenesis induction. Based on the major 153 visual difference between fibroblasts and adipocytes a visual difference mapping (VDM) was 154 obtained. The map was used to calculate the level of adipogenesis (LOA) in each culture. **Lipid droplet 155 quantification and morphological analysis:** Phase contrast Images at a magnification of x400 of 156 differentiating cultures were taken 21 and 28 days post-induction. The LDs radius and cell projected 157 area were analyzed using an image-processing-based method developed by Lustig et al<sup>51</sup>. 158

Immunoblotting: The procedures and analyses were performed according to the standard protocols 159 (www.protocol-online.net). Cells were harvested from cultures, washed with ice-cold PBS, and lysed 160 in 50 mM Tris pH 7.5, 150 mM NaCl buffer containing 1 mM EDTA, 1% NP-40 and protease inhibitors: 161 [phenylmethylsulfonyl fluoride (PMSF), 1 mM; 1-chloro-3-tosylamido-4-phenyl-2-butanone, TPCK, 10 162 µg/ml; aprotinin, 10 µg/ml (Sigma-Aldrich)]. Protein concentration was determined with BCA Protein 163 Assay Kit (Pierce 23225). Samples were re-suspended in Laemmli buffer, separated on 7.5% SDS- 164 PAGE gel, and transferred to nitrocellulose. After blocking the membranes were incubated overnight 165 with a primary antibody, anti-MYH10 (Santa Cruz; SC- 376942). Primary antibody was washed 4 times 166 for 5 min with TBST and followed by incubation with Peroxidase Anti-Mouse IgG (Jackson Immuno 167 Research) in blocking solution. Peroxidase signal was detected with chemiluminescent substrate 168 (Pierce, Rockford, IL) using Fusion FX7 (Vilber Lourmat). Coimmunoprecipitation Whole-cell lysates 169 (200µg) were incubated with Protein A/G Plus Agarose (Santa Cruz, SC-2003) and an anti-GLUT4 (SC- 170 53566) antibody overnight. The samples were washed and dissolved in Laemmli buffer. 171

Mass spectrometry: Mass spectrometry data was analyzed based on our data base that was 172 previously described<sup>6</sup> 173

RNA isolation and qPCR: Total RNA was extracted from 3T3-L1 cells (EZ RNA kit, Biological 174 Industries, Beit Haemek, Israel) and reverse transcribed to cDNA using High-Capacity cDNA Reverse 175 Transcription Kit (Applied biosystems). Transcripts levels were measured with SYBR green (Applied 176

biosystems) using STEPONE plus system (Life Technologies). All data was normalized to Actin by the 177  
delta delta CT method<sup>52</sup>. 178

The sequences of the primers are listed below: 179

| Gene          | Forward primer                | Reverse primer             |
|---------------|-------------------------------|----------------------------|
| MYH10         | "CTTTTATCAGTTGCTCTCTGG"       | "GGATCTCTTCGTGAGAGAAG"     |
| PPAR $\gamma$ | "ATTCTCAGTGGAGACCGCCC"        | "GGCGAACAGCTGAGAGGACT"     |
| GLUT4         | "TTCACGTTGGTCTCGGTGCT"        | "TAGCTCATGGCTGGAACCCG"     |
| IRS1          | "CGTAACTGGACATCACAGCAGAATG"   | "AGACGTGAGGTCCTGGTTGT"     |
| LPL           | "CATTGTAGTAGACTGGTTGTATCGGGC" | "ATCTACAAAATCAGCGTCATCA"   |
| CD36          | "GCAAAACGACTGCAGGTCAAC"       | "TCACCAATGGTCCCAGTCTCAT"   |
| Actin         | "CATCGTGGGCCGCCCTAGGCACCA"    | "CGGTTGGCCTTAGGGTTCAGGGGG" |

180

Bioinformatics pathway analysis: Bioinformatics analysis for the mass spectrometry data was 181  
performed using Perseus software as described in Mor-Yossef Moldovan et al<sup>6</sup>. Phosphorylation 182  
partners analysis was performed using the PathwatNet website<sup>53</sup>. The top fifty candidate genes were 183  
extracted and compared with Insulin pathway signaling pathway proteins (GO:0008286) that were 184  
extracted from the gene ontology database<sup>54-56</sup>. 185

Statistical analysis: Statistical analyses were analyzed by GraphPad Prism v.8.1.1. Results are 186  
presented as means  $\pm$  SEM. All results were tested for normal distribution by Kolmogorov-Smirnov 187  
test, and outliers were identified using the ROUT method. Statistical differences comparing the mean 188  
values were tested using two-tailed, unpaired t-tests or one way-ANOVA where appropriate. Values 189  
that were not normally distributed were tested using Mann-Whitney or Kruskal-Wallis (for three or 190  
more groups), followed by Dunn's post-test for multiple comparisons. A value of  $p < 0.05$  was 191  
considered statistically significant. 192

Schematic illustrations: were created by Bio Render software <https://biorender.com> 193

194

195



## Results

196

### MYH10 distribution is altered during adipogenesis in 3T3-L1 cells.

197

A previous study from our lab examined the association between changes in cell morphology and the 198 reorganization of the actin cytoskeleton<sup>6</sup>. As part of the analysis, we examined the distribution of 199 actin fibers during adipogenesis and identified the non-muscle myosin isoform (MYH10) as a potential 200 cytoskeletal protein that may impact the function of adipocytes which led us to examine the role and 201 function of MYH10 in adipocytes. Immunostaining of MYH10 (red) and F-actin (green) in 202 undifferentiated 3T3-L1 cells showed a colocalization pattern of the filaments as part of the 203 actomyosin cytoskeleton, indicating a mutual role in undifferentiated (UD-F) cells (Fig. 1A). In order 204 to examine whether MYH10 filaments undergo reorganization during adipogenesis in UD-F cells, we 205 compared the distribution of MYH10 in UD-F and differentiated cells (Diff). The results indicated a 206 substantial difference in the binary images of MYH10 during differentiation, where the organized 207 filamentous-like form distributed evenly throughout the cell in undifferentiated cells was disrupted 208 and predominantly located in a cortical ring around the cell membrane once the cells differentiated 209 (Fig. 1B). This prompted us to examine the dynamic nature of MYH10 reorganization during the 210 differentiation of adipocytes. Comparison of MYH10 in cells at different stages in the same culture 211 revealed that the coherency in UD-F was significantly higher than in Diff (0.14 and 0.016, respectively), 212 with more junctions than in Diff cells. Moreover, the MYH10 filaments in UD-F were 1.7 times longer 213 in the undifferentiated cells (Fig.1C). These observations suggest that, like actin, MYH10 undergoes 214 significant reorganizations during adipogenesis. 215

### MYH10 knockdown model.

216

As the next stage in exploring the effect of MYH10 on adipocyte function, we generated an shRNA- 217 MYH10 knockdown system in 3T3-L1 cells infected with an shRNA-MYH10 lentivirus containing a 218 histone 2B green fluorescent protein (GFP) marker (MYH10-KD). The knockdown efficacy was tested 219 by qPCR, which confirmed a substantial decrease in MYH10 levels (Fig.2A). Knockdown efficacy was 220 also examined by analyzing the percentage of transfected cells (GFP<sup>+</sup>) and examining the intensity of 221 cytoplasmic MYH10 in the GFP<sup>+</sup> cells. The results indicated that 80% of cells in the culture were GFP 222 positive, and that these cells exhibited lower levels of cytoplasmic MYH10 (Fig. 2B). 223

### MYH10 KD affects cell motility and migration.

224

Since MYH10 is known to play roles in cell migration and adhesion, we assessed the effect of its 225 depletion on cell adhesion and motility in knockdown (KD) 3T3-L1 preadipocytes and cells infected 226 with a scrambled construct (scrambled). Figure 3A presents the differences in adhesiveness between 227 the cultures. After 33 minutes of adhesion, the cell projected area of control scrambled cells was 2.5- 228 fold higher than for KD cells, suggesting a possible effect of MYH10 on cell spreading and adhesion in 229 preadipocytes (Fig. 3B). Next, we examined the impact of MYH10 KD on cell migration. The results of 230 a wound-healing assay (illustrated in fig. 3D), with the relative scratch gap measured after 4, 8, and 231 12 hours, revealed a significantly larger gap at the endpoint in MYH10 KD cells than scrambled cells 232 (40% vs. 8% respectively, Fig. 3C, D). With respect to migration, the average speed and accumulated 233 distance of individual KD cells were reduced by more than 20%, demonstrating the effect of MYH10 234 on the motility of the cells (Fig. 3E,F). Figure 3G presents representative images of the trajectories of 235 cells after 1 and 3 hours. These data support the suggestion that MYH10 is a key factor in adhesion 236 and migration. 237

### MYH10 knockdown affects adipogenesis.

238

In order to assess the effect of MYH10 on adipogenesis, scrambled and KD cultures were 239 differentiated to adipocytes and the level of adipogenesis was evaluated after 21 and 28 days. As can 240 be seen in Figure 4A, C, knockdown cultures displayed a lower LOA than the scrambled cultures; KD 241 cells exhibited little to no adipogenesis, and the fraction of differentiated cells were primarily due to 242 the WT (Wild type; GFP<sup>-</sup>) cell population in the culture. Quantification of the LOA (the percentage of 243 adipocytes in the culture relative to the scrambled cells) confirmed the reduction in adipogenesis in 244 the knockdown cells (Fig. 4B). With respect to adipogenesis-related morphologic parameters, 245 scrambled cells had a significantly greater cell area than the MYH10 KD cells (1800  $\mu\text{m}^2$  versus 520 246  $\mu\text{m}^2$ , respectively). They also had larger lipid droplets (3.3  $\mu\text{m}$  in the scrambled cells compared to 247 1.5  $\mu\text{m}$ , respectively (Fig. 4E)). Both the cell area and size of lipid droplets rose significantly between 248 day 21 and day 28 of differentiation, but only in the scrambled cells, suggesting that adipogenesis 249 ceased mid-differentiation in the KD cultures. Figure 4F presents the reduction in the expression of 250 principal adipogenic markers in the knockdown cultures, with significant downregulation of all 251

measured markers (PPAR $\gamma$ , GLUT4, IRS1, LPL, and CD36). This observation supports the results of a 252  
lack of adipogenesis due to the knockdown of MYH10, and together, these data strongly suggest a 253  
major role for MYH10 in adipocyte differentiation. 254

#### Co-expression of glucose transporter 4 and MYH10. 255

While MYH9, an MYH10 paralog, is known to interact with GLUT4 and was shown to affect its 256  
intracellular translocation, this aspect of MYH10 has never been extensively studied. Immunostaining 257  
of MYH10 and GLUT4 in murine visceral adipose tissue revealed a similar cortical/membranal 258  
expression pattern in mature adipocytes (Fig. 5A). Co-immunoprecipitation of adipose tissue 259  
preparations with GLUT4 followed by a western blot with MYH10 demonstrated an association 260  
between the two proteins and suggested the presence of a GLUT4:MYH10 complex in the tissue (Fig. 261  
5B). As for adipose tissue, immunofluorescence staining in 3T3-L1 cells demonstrated colocalization 262  
of MYH10 and GLUT4, particularly in the cell membrane and the cortical area of the cells (Fig. 5C). 263  
Similarly, GLUT4 and MYH10 also co-immunoprecipitated from differentiated 3T3-L1 cells, indicating 264  
that the proteins exist together in a complex both in-vivo and in-vitro (Fig. 5D). Mass spectrometry of 265  
undifferentiated and differentiated adipocytes revealed the expected differential expression of 266  
glucose transporters. GLUT1 is expressed in fibroblasts, and the level increases in adipocytes, while 267  
GLUT4 is expressed only by differentiated adipocytes, highlighting the importance of GLUT4 in 268  
adipogenesis (Fig. 5E). These data suggest that the effect of MYH10 on adipogenesis may be related 269  
to the interaction with GLUT4. 270

#### MYH10 colocalization and interaction with GLUT4 is induced by insulin. 271

Since GLUT4 translocation is insulin-dependent, we examined the changes in the expression and 272  
localization of MYH10 in response to insulin. After differentiation, 3T3-L1 cells were starved for one 273  
hour and then induced with insulin for a further 30 minutes. Immunostaining of MYH10 and GLUT4 in 274  
induced and uninduced cells revealed that insulin-induction strongly increases the expression of 275  
GLUT4 in the membranal compartment. MYH10 exhibited a similar pattern, with prominent 276  
expression in the cortical region of stimulated cells (Fig. 6A). Intensity plots also revealed 277  
colocalization of MYH10 and GLUT4 after induction (Fig. 6B). The membranal to cytoplasmatic ratio 278  
(MCR) of GLUT4 was 1.5-fold higher after insulin stimuli, meaning that more GLUT4 was translocated 279

to the membrane post-induction (Fig. 6C). Quantification of MYH10 MCR also demonstrated a similar 280 increase post stimulus (1.48-fold, Fig. 6C). We then examined the effect of insulin induction on total 281 MYH10 expression; a western blot of MYH10 after 15 and 30 minutes showed no difference in MYH10 282 levels indicating that insulin primarily affects the localization and function but not the expression 283 levels of MYH10 in adipocytes (Fig 6D). Co-immunoprecipitation with GLUT4 followed by a western 284 blot with MYH10 revealed an increase in the MYH10:GLUT4 complex in cells after insulin induction, 285 implying a functional role for MYH10 in GLUT4 translocation in induced adipocytes (Fig. 6E). Overall, 286 these results indicate that MYH10 is connected to the insulin pathway with a possible effect on GLUT4 287 translocation from the cytoplasm to the cell's membrane. 288

#### GLUT4<sup>+</sup> shuttling can restore the adipogenic capacity of MYH10 KD cells.

In order to determine whether the adipogenic capacity of MYH10 cells can be restored by the 290 transportation of GLUT4 from neighboring cells, we established a co-culture model of 3T3-L1 cells 291 expressing a GLUT4-mCherry (GLUT4<sup>+</sup>) with MYH10-KD cells expressing nuclear GFP. The labeled 292 GLUT4 (red) in GLUT4<sup>+</sup> enables us to track the movement of GLUT4 between cells and analyze cell-to- 293 cell interactions. Co-cultures of GFP Scramble cells with the preadipocytes stained with PKH26 red 294 fluorescent dye or marked GLUT4<sup>+</sup> cells were used to examine the basic cell-to-cell interaction model. 295 The results presented in Fig. 7A clearly show the uptake of red-labeled particles by the GFP<sup>+</sup> cells in 296 both cases. Phase-contrast images of differentiated GLUT4<sup>+</sup> and MYH10-KD monocultures 297 demonstrated their disparate adipogenic capacity (Fig. 7B). Images of the differentiated co-cultures 298 revealed numerous GFP<sup>+</sup> adipocytes filled with GLUT4-mCherry staining (Fig. 7C). Unsurprisingly, the 299 LOA of co-cultures of MYH10-KD and GLUT4<sup>+</sup> was higher than GFP<sup>+</sup> cells alone (Fig. 7D). Strikingly, the 300 number of differentiated GFP<sup>+</sup> cells per field was significantly higher in the co-culture (average of 4 301 compared to < 1 in the GFP culture, Fig. 7E). These results may suggest that labeled GLUT4 is taken 302 up by GFP<sup>+</sup> cells to compensate for the lack of GLUT4 transferred from within the cell to its outer 303 membrane and indicate the presence of cellular communication that can transfer GLUT4 from 304 neighboring cells to support and induce the differentiation of MYH10-KD cells. 305

## MYH10 interaction with GLUT4 post insulin induction is mediated by PKC $\zeta$ .

306

A number of pathways and effectors are known to regulate the function of MYH10 through 307 phosphorylation. We used PathwayNet analysis, a web-based tool for diverse protein-to-protein 308 interactions to identify potential phosphorylation partners of MYH10 in order to better understand 309 its involvement in insulin-induced GLUT4 translocation (Fig. 8A). After retrieving the top PathwayNet 310 phosphorylation candidates, we crossmatched them to the gene ontology list of insulin signaling 311 pathway-related proteins. PKC $\zeta$ , a protein kinase C protein, was the lead candidate, since it is a known 312 component of the insulin signaling pathway and a potential MYH10 phosphorylation partner. In order 313 to further explore the hypothesis that PKC $\zeta$  affects MYH10 function, we used a myristoylated pseudo- 314 substrate inhibitor for PKC $\zeta$  to examine the effect on MYH10 activity. Insulin-induced differentiated 315 3T3-L1 cells were incubated with and without the inhibitor to examine its effect on MYH10 and GLUT4. 316 As shown in Fig. 8B-C, insulin induction triggered a ring-like membranal expression of both MYH10 317 and GLUT4. In contrast, the inhibitor dramatically disturbed the translocation and localization of 318 MYH10 and GLUT4, resulting in chaotic and disruptive expression of both proteins. 319

Furthermore, MCR analysis revealed a substantial decline in membranal and cortical expression of 320 both GLUT4 and MYH10, where the MCR was decreased 1.7-fold for GLUT4, and 2-fold for MYH10 in 321 the presence of the inhibitor (Fig. 8D-E). Taken together, these results suggest that PKC $\zeta$  inhibition 322 attenuated cortical MYH10 assembly and GLUT4 translocation to the membrane. Notably, the PKC $\zeta$  323 inhibitor also affected the formation of the GLUT4:MYH10 complex, with fewer complexes formed in 324 the inhibited cells compared to the insulin-induced cells (Fig. 8F). Overall, our results demonstrate the 325 importance of MYH10 in adipocyte function and adipogenesis through its involvement in insulin 326 induced GLUT4 translocation regulated by PKC $\zeta$ . These results provide important insights into the 327 relationship between insulin signaling, GLUT4 translocation, and cytoskeleton rearrangement, where 328 MYH10 play an essential role. 329

## Discussion

330

Differentiation of preadipocytes is a complex process that is associated with changes in cell 331 morphology. The early stages of adipogenesis require extensive remodeling and organization of 332 various cytoskeletal components regulated by changes in the ECM<sup>52,57,58</sup>, while in latter parts of 333

differentiation and general metabolism, these components are key in maintaining the physiological 334 function of the cells<sup>5,11</sup>. Nevertheless, our knowledge of such elements and the molecular pathways 335 by which they affect the cells, remains unclear. This study establishes the importance of MYH10 in 336 adipogenesis and adipocyte function, and more specifically, its interaction with GLUT4 and facilitation 337 of translocation of GLUT4 to the cell membrane as part of the insulin signaling pathway. 338

We initially identified changes in the distribution of MYH10 filaments during the course of 339 adipogenesis. Non-muscle myosins (NMMs) are tightly related to actin, and their interaction is known 340 to affect rudimental cellular processes, including morphogenesis and cytokinesis<sup>59-61</sup>. The 341 cytoskeleton is vital for determining and maintaining the shape and function of adipocytes, and 342 depolymerization and repolymerization of actin affect both early adipogenesis and terminal 343 differentiation<sup>7,58</sup>. Notably, reorganization of other cytoskeletal components has been shown to 344 affect lipogenesis, mitochondrial activity, and glucose uptake in adipocytes<sup>13-15,62,63</sup>. MYH10 filaments 345 were shown to undergo reorganization in a similar fashion to actin filaments<sup>6</sup>, with a stress-fiber-like 346 appearance in preadipocytes, in contrast to the cortical distribution seen in differentiated cells. These 347 findings further support the notion of reorganization of cytoskeletal components as a potential 348 prerequisite step in adipogenesis. They also highlight the association between myosin and actin in 349 cytoskeletal reorganization and the possible importance as regulators of differentiation. 350

Subsequently, we established a knockdown model of MYH10 in 3T3-L1 cells to examine how depletion 351 of the protein affects preadipocyte and adipocyte functions. First, we assessed the consequences for 352 migration and adhesion in preadipocytes. MYH10 plays an essential role in cell polarization, motility, 353 and migration through the assembly of actomyosin filaments<sup>31,32</sup>. Previous in-vivo and in-vitro studies 354 have demonstrated the importance of MYH10 in migration. Impaired motility was reported in MYH10 355 depleted lung carcinoma cell line, glioma cells and mouse embryonic fibroblasts<sup>64,65,66</sup>. In-vivo, MYH10 356 knockout mice exhibited impaired development of cardiac and brain tissue due to impaired cell 357 adhesion and migration<sup>67-69</sup>. Our observations of a significant impact of MYH10 knockdown on cell 358 migration and spreading are consistent with those of previous studies. 359

A major finding of this study was that MYH10 has a significant effect on adipogenesis, with knockdown 360 cells displaying no morphological or molecular indications of adipogenesis. The function of MYH10 as 361

a regulator of differentiation can probably be attributed to the interaction with other cytoskeletal components such as actin, that together with ECM signaling and modifications, regulate differentiation. Previous studies have reported the importance of MYH10 in the morphogenesis of a variety of organs through regulation of cell shape and ECM remodeling<sup>70–72</sup>. However, our study is the first to show the importance of MYH10 in adipocytes as prior research focused mainly on MYH9, a paralog of MYH10 and a member of the NMM family<sup>25,26,29,37,38,73–75</sup>. Such studies reported that MYH9 affects the secretion of adiponectin and the translocation of GLUT4 vesicles through an interaction with actin filaments<sup>26,38,75</sup>. The relationship between MYH9 and GLUT4 was studied extensively and showed to affect GLUT4 translocation and glucose uptake in insulin-stimulated adipocytes<sup>25,26,29,37,74,75</sup>. Moreover, Blebbistatin, a myosin inhibitor that affects both isoforms of NMMs, also inhibited glucose uptake in insulin-stimulated adipocytes<sup>25,26</sup>. Although the effect was mainly attributed to MYH9, these observations prompted us to examine the relationship between MYH10 and GLUT4. 374

The results presented here, demonstrate that, both in-vitro and in-vivo, MYH10 and GLUT4 exist in a functional protein complex localized in the cell membrane. In addition, they also implicate the involvement of MYH10 in the insulin pathway since induction with insulin altered its localization and interaction with GLUT4. Since previous studies reported that, in contrast to MYH9, MYH10 is highly expressed in the cortex of both stimulated and stimulated adipocytes<sup>26</sup>, we used the MCR method to assess the changes in its cortical expression to reveal the upregulation after exposure to insulin. The same method was also used to quantify the MCR as an indicator of membranal expression of GLUT4<sup>49</sup>. The results indicate that MYH10 and GLUT4 are upregulated in response to insulin, both individually and as a complex. We therefore suggest that the insulin dependent GLUT4 translocation to the cell membrane, may be regulated by MYH10. These results may help us to better understand the overlapping and unique roles of different NMMs, specifically in adipocyte function, and the importance of MYH10 in adipogenesis. 386

The MYH10 knockdown adipogenesis model showed that the WT population in the cultures can induce the differentiation of KD cell, with several differentiated GFP<sup>+</sup> cells primarily in areas with differentiated WT cells. This finding suggests that the WT population may secrete and transfer factors that induce adipogenesis even in MYH10-KD cells. Because of the observed interaction between 390

GLUT4 with MYH10, we hypothesized that co-culturing of MYH10-KD with GLUT4<sup>+</sup> cells could have an 391 effect on the adipogenic potential of the MYH10-KD cells. In this context, adipocytes are known to be 392 able to sense their niche and interact with neighboring cells either directly or indirectly<sup>76,77</sup>. Notably, 393 we were able to restore some adipogenic capacity to MYH10 depleted cells by uptake of GLUT4 394 particles from neighboring GLUT4<sup>+</sup> cells in co-culture (Fig. 7C,E). The transport of extracellular vesicles 395 containing GLUT4 from other cells, has been reported previously<sup>78</sup>, and this method of cellular 396 communication is of great interest because of its potential in the regulation of adipocyte 397 differentiation and function. 398

The regulation of NMMs differs from that of cardiac and muscle myosins and involves the 399 phosphorylation of regulatory light chains and the tails of the heavy chains themselves<sup>30,32</sup>. 400 Phosphorylation of the non-muscle myosin tails can promote the reorganization and localization of 401 actomyosin filaments<sup>79-84</sup>. We predicted that some regulators of MYH10 may also be downstream 402 effectors of the insulin pathway and may govern MYH10 activity in that regard. We were able to 403 identify PKCζ as a regulator of MYH10 function in induced adipocytes. Our investigations into potential 404 regulators of MYH10 activity indicated a possible role for PKCζ in regulating MYH10 activity via the 405 insulin pathway, and indeed, its inhibition impeded MYH10 and GLUT4 activity. PKCζ is an atypical 406 protein kinase C protein that was previously shown to be highly related to the insulin pathway. It is 407 phosphorylated by phosphatidylinositol (PI) 3-kinase and, in turn, can phosphorylate various 408 downstream effectors that regulate GLUT4 translocation<sup>39,40</sup>. PKCζ also regulates the required 409 cytoskeletal reorganization that accompanies insulin signaling and can affect the polymerization of 410 actin that is crucial for GLUT4 shuttling, placing it at the intersection of insulin signaling and 411 cytoskeleton activity<sup>85-87</sup>. The different non-muscle myosins have several overlapping and unique 412 regulators both through their regulatory light chains and heavy chains<sup>30,32</sup>. Interestingly, MYH10 is the 413 only non-muscle myosin regulated by PKCζ, which highlights the differences in function and regulation 414 of the different myosin isoforms<sup>79,88,89</sup>. The reported effects of PKCζ on the cytoskeletal association, 415 mechanoresponsiveness, and cortical localization of MYH10 are in good agreement with our finding 416 that it regulates the localization of MYH10 in response to insulin and that inhibition of PKCζ inhibited 417 MYH10 and GLUT4 activity<sup>79,90</sup>. Our observations suggest that PKCζ is phosphorylated as part of the 418 insulin pathway, and in turn, can trigger MYH10 cortical activity that facilitates GLUT4 translocation 419



to the membrane because of their interaction (Fig. 8G). The suggested pathway further highlights the 420  
strong relationship between cytoskeleton activity and cellular functioning. 421

In conclusion, we have identified MYH10 as a novel effector of adipogenesis and adipocyte function. 422  
Our results demonstrate that MYH10 regulates the translocation of GLUT4 through insulin-induced 423  
PKC $\zeta$  activation, and that MYH10-KD inhibits adipogenesis. These observations further support the 424  
importance of cytoskeleton proteins in adipocyte function and differentiation. Future in-vivo studies 425  
that incorporate pathophysiological conditions and their effect on MYH10 function in adipocytes will 426  
undoubtedly prove informative. 427

**Acknowledgments:** Mike Egozi participated in the project as part of the JInternship program. We 428  
acknowledge Ann Avron for the editorial assistance. 429

**Conflicts of Interest:** The authors declare no conflict of interest. 430

## Legends

|                      |                                                                                                                                                                                                                                                                                                                                                                                                                                                                                                                                                                                                                                                                                                                                                                                                                                                                                                                                                                                                                                                                                                                                                                                                                                                                                                                                                                                                                                                                                                                                                   |
|----------------------|---------------------------------------------------------------------------------------------------------------------------------------------------------------------------------------------------------------------------------------------------------------------------------------------------------------------------------------------------------------------------------------------------------------------------------------------------------------------------------------------------------------------------------------------------------------------------------------------------------------------------------------------------------------------------------------------------------------------------------------------------------------------------------------------------------------------------------------------------------------------------------------------------------------------------------------------------------------------------------------------------------------------------------------------------------------------------------------------------------------------------------------------------------------------------------------------------------------------------------------------------------------------------------------------------------------------------------------------------------------------------------------------------------------------------------------------------------------------------------------------------------------------------------------------------|
| <p><b>Fig.1</b></p>  | <p><b>MYH10 distribution is altered during adipogenesis in 3T3-L1 cells</b> (A) Immunostaining of preadipocytes (magnification of X630, scale bar=50µm) stained for MYH10 (red), Phalloidin (green) and DAPI (blue) and an enlargement of MYH10 and actin filament colocalization with a line scan of corresponding fluorescence intensities of MYH10 (red) and actin (green) (B) A binary illustration of MYH10 staining in an adipocyte (Diff) and a preadipocyte (UF-D) (C) Quantification of the coherency, number of junctions and length of MYH10 in adipocytes (Diff, n=24) and preadipocytes (UF-D, n=24), Significance was calculated using unpaired nonparametric Mann-Whitney test. Error bars represent means ± SEM.</p>                                                                                                                                                                                                                                                                                                                                                                                                                                                                                                                                                                                                                                                                                                                                                                                                              |
| <p><b>Fig. 2</b></p> | <p><b>MYH10 KD model.</b> (A) mRNA expression of MYH10 in Scramble and MYH10-KD cells, measured in preadipocytes. (B) Immunostaining of DAPI (blue) and MYH10-H2B-GFP (green nuclei) in MYH10-KD cultures (magnification of X400, scale bar=50 µm), Immunostaining for MYH10 (red), DAPI (blue), and MYH10-H2B-GFP (green nuclei) in MYH10-KD preadipocyte cultures (scale bar equal 50 µm), morphometric analysis of the average GFP positive cells in MYH10-KD cultures and a single-cell analysis of MYH10 fluorescent intensity in the cytoplasm, significance was calculated using an unpaired nonparametric Mann-Whitney test, error bars represent means ± SEM.</p>                                                                                                                                                                                                                                                                                                                                                                                                                                                                                                                                                                                                                                                                                                                                                                                                                                                                        |
| <p><b>Fig. 3</b></p> | <p><b>MYH10 KD affects cell motility and migration.</b> (A) Representative phase-contrast images from an adhesion assay of Scramble (Scr) and MYH10-KD cells 21 minutes after they were seeded, demonstrating the differences between Scr and MYH10-KD cells' adhesion rates. (Magnification X200, scale bar, 125µm). (B) Single-cell analysis of the mean cell area at the indicated time points (n&gt;90). Significance was calculated using Two-way ANOVA with Sidak's post-test. (C) Wound healing assay, the ratio of the remaining gap at a given time to the gap at the starting point, Scramble (black) and KD cells (grey) (n=3), Significance was calculated using Two-way ANOVA with Sidak's post-test. (D) Representative pictures of a wound-healing assay of the Scr and MYH10-KD cells at the indicated time points (magnification of X40, scale bar equals 650µm) (E) Illustrative Images of the migration trails of Scr and MYH10-KD cells at the indicated time points. Each colored path illustrates the migration of an individual cell over time (magnification X200, scale bar, 125 µm). (E) Accumulative distance and (F) mean speed of Scramble and MYH10-KD cells (n=40), Significance was calculated using unpaired nonparametric Mann-Whitney test. (G) Illustrative Images of the migration trails of Scr and MYH10-KD cells at the indicated time points. Each colored path illustrates the migration of an individual cell over time (magnification X200, scale bar, 125 µm). Error bars represent means ± SEM.</p> |
| <p><b>Fig. 4</b></p> | <p><b>MYH10 knockdown affects adipogenesis</b> (A) Images of scrambled (Scr), and MYH10-KD cultures, at 28 days after initiation of adipogenesis (scale bar=650 µm) (B) level of adipogenesis (percentage of adipocytes in the culture) of Scr</p>                                                                                                                                                                                                                                                                                                                                                                                                                                                                                                                                                                                                                                                                                                                                                                                                                                                                                                                                                                                                                                                                                                                                                                                                                                                                                                |

|               |                                                                                                                                                                                                                                                                                                                                                                                                                                                                                                                                                                                                                                                                                                                                                                                                                                                                                                                                                                                                                                                                                                                                                                                                                                                                                |
|---------------|--------------------------------------------------------------------------------------------------------------------------------------------------------------------------------------------------------------------------------------------------------------------------------------------------------------------------------------------------------------------------------------------------------------------------------------------------------------------------------------------------------------------------------------------------------------------------------------------------------------------------------------------------------------------------------------------------------------------------------------------------------------------------------------------------------------------------------------------------------------------------------------------------------------------------------------------------------------------------------------------------------------------------------------------------------------------------------------------------------------------------------------------------------------------------------------------------------------------------------------------------------------------------------|
|               | <p>(grey, n=4) and MYH10-KD (green, n=4) cultures, day 28 post differentiation, significance was calculated using unpaired nonparametric Mann-Whitney test. (C) The experimental model and phase contrast overlay with florescent GFP (H2B-GFP) at 28 days after initiation of adipogenesis in Scr and MYH10-KD cells (scale bar equals 75 <math>\mu</math>m, magnification of X400). Morphology measurements for (E) cell-projected area and (E) lipid droplets radius for Scr, and MYH10-KD cells, measured 21 and 28 days after adipogenic induction, significance was calculated using one-way ANOVA with Tukey's post-test (<math>p &lt; 0.0001</math>) (F) quantitative PCR of Scr (grey) and MYH10-KD (green) cells (n=3 per group) for PPAR<math>\gamma</math>, GLUT4, IRS1, LPL and CD36, significance was calculated by an unpaired student t-test profile. Error bars represent means <math>\pm</math> SEM.</p>                                                                                                                                                                                                                                                                                                                                                     |
| <b>Fig. 5</b> | <p><b>Co-expression of Glucose transporters 4 and MYH10.</b> (A) Whole mount staining of MYH10 (red), GLUT4 (green) and DAPI (blue) in murine visceral adipose tissue (Magnification of X200, scale bar=50<math>\mu</math>m) and Co-Immunoprecipitation of GLUT4 and WB for MYH10 and Actin in murine visceral adipose tissue (B) Immunofluorescence staining of MYH10 (red), GLUT4 (green) and DAPI (blue) in adipocytes. (Magnification of X630, scale bar=50<math>\mu</math>m), Co-Immunoprecipitation of GLUT4 and WB for MYH10 and Actin in differentiated 3T3-L1 cells and a LFQ intensity histogram from a mass spectrometry analysis for GLUT4 and GLUT1 in undifferentiated (Diff) and differentiated 3T3-L1 cells.</p>                                                                                                                                                                                                                                                                                                                                                                                                                                                                                                                                               |
| <b>Fig. 6</b> | <p><b>MYH10 localization and interaction with GLUT4 is induced by insulin.</b> (A) Immunofluorescence staining of MYH10 (red), GLUT4 (green) and DAPI (blue) in differentiated 3T3-L1 cells +/- 30 min of insulin induction. (Magnification of X630, scale bar=50<math>\mu</math>m). (B) Enlargements of differentiated 3T3-L1 cells (+/- insulin) and Intensity line profiles of MYH10 (red) and GLUT4 (green) of the membranal and cytoplasmatic profile. (Magnification of X630, scale bar =50 <math>\mu</math>m). (C) Cortical to cytoplasmatic intensity ratio quantification of MYH10 in differentiated insulin induced (n=41) and non-induced (n=37) 3T3-L1 cells, significance was calculated using unpaired nonparametric Mann-Whitney test. (D) Membranal to cytoplasmatic intensity ratio quantification of GLUT4 in differentiated insulin induced (n=41) and non-induced (n=37) 3T3-L1 cells, significance was calculated using unpaired nonparametric Mann-Whitney test. (E) Western blot analysis of MYH10 in differentiated 3T3-L1 cells 0,15- and 30-minutes post insulin induction (F) Co-Immunoprecipitation of GLUT4 and WB for MYH10 in differentiated 3T3-L1 cells +/- 30 min of insulin induction. Error bars represent means <math>\pm</math> SEM.</p> |
| <b>Fig. 7</b> | <p><b>GLUT4<sup>+</sup> cells can restore the adipogenic capacity of MYH10 KD cells.</b> (A) Image of vesicles stained with PKH26 (right) that were internalized by GFP<sup>+</sup> cells (green nucleus) and image of differentiating MYH10-KD (green nucleus) cells with internalized GLUT4-mcherry (red) (scale bar 62.5<math>\mu</math>m) (down). (B) Phase contrast overlay with florescent GLUT4<sup>+</sup> (left) and MYH10-KD (right) differentiated cultures (scale bar=125<math>\mu</math>m, magnification of X400). (C) Image of</p>                                                                                                                                                                                                                                                                                                                                                                                                                                                                                                                                                                                                                                                                                                                               |

|               |                                                                                                                                                                                                                                                                                                                                                                                                                                                                                                                                                                                                                                                                                                                                                                                                                                                                                                                                                                                                                                                                                                                                                                                                                                                                                                                                                                                                                                                                                                                                                                                                                                                                                                                                                                                                                                                                                              |
|---------------|----------------------------------------------------------------------------------------------------------------------------------------------------------------------------------------------------------------------------------------------------------------------------------------------------------------------------------------------------------------------------------------------------------------------------------------------------------------------------------------------------------------------------------------------------------------------------------------------------------------------------------------------------------------------------------------------------------------------------------------------------------------------------------------------------------------------------------------------------------------------------------------------------------------------------------------------------------------------------------------------------------------------------------------------------------------------------------------------------------------------------------------------------------------------------------------------------------------------------------------------------------------------------------------------------------------------------------------------------------------------------------------------------------------------------------------------------------------------------------------------------------------------------------------------------------------------------------------------------------------------------------------------------------------------------------------------------------------------------------------------------------------------------------------------------------------------------------------------------------------------------------------------|
|               | <p>MYH10-KD (green nuclei) in a co-culture with GLUT4<sup>+</sup> Cells 28 days post differentiation. (Scale bar=125 (right) and 75<math>\mu</math>m (left), magnification of X400). (D) level of adipogenesis (percentage of adipocytes in the culture) of co-cultures of GLUT4 cells with MYH10 KD cells (light grey) and MYH10-KD cells (dark grey), significance was calculated using a two-tailed unpaired student's t-test. (E) Number of differentiated GFP<sup>+</sup> cells in a culture in co-cultures of GLUT4<sup>+</sup> cells with MYH10-KD cells (light grey) and MYH10-KD cells (dark grey), significance was calculated using a two-tailed unpaired student's t-test, error bars represent means <math>\pm</math> SEM.</p>                                                                                                                                                                                                                                                                                                                                                                                                                                                                                                                                                                                                                                                                                                                                                                                                                                                                                                                                                                                                                                                                                                                                                  |
| <b>Fig. 8</b> | <p><b>MYH10 interaction with GLUT4 post insulin induction is mediated by PKC<math>\zeta</math>.</b> (A) A network analysis of MYH10 potential upstream phosphorylation partners. Generated by PathwayNet and a Venn diagram of GO:0008286, insulin receptor signaling pathway proteins and MYH10 potential upstream phosphorylation partners intersection. (B) Immunofluorescence staining of MYH10 (red), GLUT4 (green) and DAPI (blue) in differentiated 3T3-L1 cells after 30 min of insulin induction w/o PKC<math>\zeta</math> pseudosubstrate inhibitor. (Magnification of X630, scale bar=50<math>\mu</math>m). (C) Enlargements of differentiated 3T3-L1 cells +/- the PKC<math>\zeta</math> pseudosubstrate inhibitor and Intensity line profiles of MYH10 (red) and GLUT4 (green) of the membranal and cytoplasmatic profile. (Magnification of X630, scale bar=50<math>\mu</math>m). (D) Quantification of the ratio between the cortical and cytoplasmatic intensity of MYH10 in differentiated insulin induced 3T3-L1 cells with PKC<math>\zeta</math> inhibitor (n=41, orange) and without PKC<math>\zeta</math> inhibitor (n=41, red), significance was calculated using unpaired nonparametric Mann-Whitney test. (E) Quantification of the ratio between the Membranal and cytoplasmatic intensity of GLUT4 in differentiated insulin induced 3T3-L1 cells with PKC<math>\zeta</math> inhibitor (n=41, orange) and without PKC<math>\zeta</math> inhibitor (n=41, red), significance was calculated using unpaired nonparametric Mann-Whitney test (F) Co-Immunoprecipitation of GLUT4 and WB for MYH10 in differentiated 3T3-L1 cells after 30 min of insulin induction w/o PKC<math>\zeta</math> inhibitor. (G) Schematic illustration of the purposed role of PKC<math>\zeta</math> and MYH10 in insulin signaling. Error bars represent means <math>\pm</math> SEM.</p> |

| References                                                                                                                                                                                                                                                                                                                                                                           | 432                      |
|--------------------------------------------------------------------------------------------------------------------------------------------------------------------------------------------------------------------------------------------------------------------------------------------------------------------------------------------------------------------------------------|--------------------------|
| 1. Tang QQ, Lane MD. Adipogenesis: From stem cell to adipocyte. <i>Annu Rev Biochem.</i> 2012;81:715-736. doi:10.1146/annurev-biochem-052110-115718                                                                                                                                                                                                                                  | 433<br>434               |
| 2. Rosen ED, MacDougald OA. Adipocyte differentiation from the inside out. <i>Nat Rev Mol Cell Biol.</i> 2006;7(12):885-896. doi:10.1038/nrm2066                                                                                                                                                                                                                                     | 435<br>436               |
| 3. Goldrick RB. Morphological changes in the adipocyte during fat deposition and mobilization. <i>Am J Physiol.</i> 1967;212(4):777-782. doi:10.1152/AJPLEGACY.1967.212.4.777                                                                                                                                                                                                        | 437<br>438               |
| 4. Novikoff AB, Novikoff PM, Rosen OM, Rubin CS. Organelle relationships in cultured 3T3-L1 preadipocytes. <i>J Cell Biol.</i> 1980;87(1):180-196. doi:10.1083/JCB.87.1.180                                                                                                                                                                                                          | 439<br>440               |
| 5. Chalut KJ, Paluch EK. The Actin Cortex: A Bridge between Cell Shape and Function. <i>Dev Cell.</i> 2016;38(6):571-573. doi:10.1016/j.devcel.2016.09.011                                                                                                                                                                                                                           | 441<br>442               |
| 6. Mor-Yossef Moldovan L, Lustig M, Naftaly A, Mardamshina M, Geiger T, Gefen A, Benayahu D. Cell shape alteration during adipogenesis is associated with coordinated matrix cues. <i>J Cell Physiol.</i> 2019 Apr;234(4):3850-3863. doi: 10.1002/jcp.27157                                                                                                                          | 443<br>444<br>445        |
| 7. Kunitomi H, Oki Y, Onishi N, Kano K, Banno K, Aoki D, Saya H, Nobusue H. The insulin-PI3K-Rac1 axis contributes to terminal adipocyte differentiation through regulation of actin cytoskeleton dynamics. <i>Genes Cells.</i> 2020 Mar;25(3):165-174. doi: 10.1111/gtc.12747                                                                                                       | 446<br>447<br>448<br>449 |
| 8. Spiegelman BM, Farmer SR. Decreases in tubulin and actin gene expression prior to morphological differentiation of 3T3 adipocytes. <i>Cell.</i> 1982;29(1):53-60. doi:10.1016/0092-8674(82)90089-7                                                                                                                                                                                | 450<br>451<br>452        |
| 9. Spiegelman BM, Ginty CA. Fibronectin modulation of cell shape and lipogenic gene expression in 3t3-adipocytes. <i>Cell.</i> 1983;35(3 PART 2):657-666. doi:10.1016/0092-8674(83)90098-3                                                                                                                                                                                           | 453<br>454<br>455        |
| 10. Tong P, Khayat ZA, Huang C, Patel N, Ueyama A, Klip A. Insulin-induced cortical actin remodeling promotes GLUT4 insertion at muscle cell membrane ruffles. <i>J Clin Invest.</i> 2001;108(3):371-381. doi:10.1172/JCI200112348                                                                                                                                                   | 456<br>457<br>458        |
| 11. Tsakiridis, T., Tong, P., Matthews, B., Tsiani, E., Bilan, P.J., Klip, A. and Downey, G.P. Role of the actin cytoskeleton in insulin action. <i>Microsc. Res. Tech.</i> 1999, 47: 79-92. <a href="https://doi.org/10.1002/(SICI)1097-0029(19991015)47:2&lt;79::AID-JEMT1&gt;3.0.CO;2-S">https://doi.org/10.1002/(SICI)1097-0029(19991015)47:2&lt;79::AID-JEMT1&gt;3.0.CO;2-S</a> | 459<br>460<br>461        |
| 12. Kim JI, Park J, Ji Y, Jo K, Han SM, Sohn JH, Shin KC, Han JS, Jeon YG, Nahmgoong H, Han KH, Kim J, Kim S, Choe SS, Kim JB. During Adipocyte Remodeling, Lipid Droplet Configurations Regulate Insulin Sensitivity through F-Actin and G-Actin Reorganization. <i>Mol Cell Biol.</i> 2019 Sep 27;39(20):e00210-19. doi: 10.1128/MCB.00210-19                                      | 462<br>463<br>464<br>465 |
| 13. Brozinick JT, Jr., Berkemeier BA, Elmendorf JS. "Acting" on GLUT4: Membrane & Cytoskeletal Components of Insulin Action. <i>Curr Diabetes Rev.</i> 2007;3(2):111. doi:                                                                                                                                                                                                           | 466<br>467               |

|     |                                                                                                                                                                                                                                                                                                                           |                          |
|-----|---------------------------------------------------------------------------------------------------------------------------------------------------------------------------------------------------------------------------------------------------------------------------------------------------------------------------|--------------------------|
|     | 10.2174/157339907780598199.                                                                                                                                                                                                                                                                                               | 468                      |
| 14. | Kanzaki M, Pessin JE. Insulin-stimulated GLUT4 translocation in adipocytes is dependent upon cortical actin remodeling. <i>J Biol Chem.</i> 2001 Nov 9;276(45):42436-44. doi: 10.1074/jbc.M108297200.                                                                                                                     | 469<br>470<br>471        |
| 15. | Guilherme A, Emoto M, Buxton JM, Bose S, Sabini R, Theurkauf WE, Leszyk J, Czech MP. Perinuclear localization and insulin responsiveness of GLUT4 requires cytoskeletal integrity in 3T3-L1 adipocytes. <i>J Biol Chem.</i> 2000;275(49):38151-38159. doi:10.1074/JBC.M003432200                                          | 472<br>473<br>474<br>475 |
| 16. | Klip A, McGraw TE, James DE. Thirty sweet years of GLUT4. <i>J Biol Chem.</i> 2019;294(30):11369-11381. doi:10.1074/JBC.REV119.008351                                                                                                                                                                                     | 476<br>477               |
| 17. | Antonescu CN, Foti M, Sauvonnet N, Klip A. Ready, set, internalize: Mechanisms and regulation of GLUT4 endocytosis. <i>Biosci Rep.</i> 2009;29(1):1-11. doi:10.1042/BSR20080105                                                                                                                                           | 478<br>479               |
| 18. | Abel ED, Peroni O, Kim JK, Kim YB, Boss O, Hadro E, Minnemann T, Shulman GI, Kahn BB. Adipose-selective targeting of the GLUT4 gene impairs insulin action in muscle and liver. <i>Nature.</i> 2001;409(6821):729-733. doi:10.1038/35055575                                                                               | 480<br>481<br>482        |
| 19. | Garvey WT, Maianu L, Huecksteadt TP, Birnbaum MJ, Molina JM, Ciaraldi TP. Pretranslational suppression of a glucose transporter protein causes insulin resistance in adipocytes from patients with non-insulin-dependent diabetes mellitus and obesity. <i>J Clin Invest.</i> 1991;87(3):1072-1081. doi:10.1172/JCI115068 | 483<br>484<br>485<br>486 |
| 20. | Liao W, Nguyen MTA, Imamura T, Singer O, Verma IM, Olefsky JM. Lentiviral Short Hairpin Ribonucleic Acid-Mediated Knockdown of GLUT4 in 3T3-L1 Adipocytes. <i>Endocrinology.</i> 2006;147(5):2245-2252. doi:10.1210/EN.2005-1638                                                                                          | 487<br>488<br>489        |
| 21. | Hauer H, Röhrig K, Spelleken M, Liu L, Eckel J. Development of insulin-responsive glucose uptake and GLUT4 expression in differentiating human adipocyte precursor cells. <i>Int J Obes</i> 1998 225. 1998;22(5):448-453. doi:10.1038/sj.ijo.0800606                                                                      | 490<br>491<br>492        |
| 22. | Fletcher LM, Welsh GI, Oatey PB, Tavaré JM. Role for the microtubule cytoskeleton in GLUT4 vesicle trafficking and in the regulation of insulin-stimulated glucose uptake. <i>Biochem J.</i> 2000;352(Pt 2):267. Erratum in: <i>Biochem J</i> 2001 Feb 1;353 Pt 3:735.                                                    | 493<br>494<br>495        |
| 23. | Boguslavsky S, Chiu T, Foley KP, Osorio-Fuentealba C, Antonescu CN, Bayer KU, Bilan PJ, Klip A. Myo1c binding to submembrane actin mediates insulin-induced tethering of GLUT4 vesicles. <i>Mol Biol Cell.</i> 2012;23(20):4065. doi:10.1091/MBC.E12-04-0263                                                              | 496<br>497<br>498        |
| 24. | Chen Y, Wang Y, Zhang J, Deng Y, Jiang L, Song E, Wu XS, Hammer JA, Xu T, Lippincott-Schwartz J. Rab10 and myosin-Va mediate insulin-stimulated GLUT4 storage vesicle translocation in adipocytes. <i>J Cell Biol.</i> 2012;198(4):545-560. doi:10.1083/JCB.201111091                                                     | 499<br>500<br>501        |
| 25. | Chung le TK, Hosaka T, Harada N, Jambaldorj B, Fukunaga K, Nishiwaki Y, Teshigawara K, Sakai T, Nakaya Y, Funaki M. Myosin IIA participates in docking of Glut4 storage vesicles with the plasma membrane in 3T3-L1 adipocytes. <i>Biochem Biophys Res Commun.</i>                                                        | 502<br>503<br>504        |

|     |                                                                                                                                                                                                                                                                                     |                          |
|-----|-------------------------------------------------------------------------------------------------------------------------------------------------------------------------------------------------------------------------------------------------------------------------------------|--------------------------|
|     | 2010;391(1):995-999. doi:10.1016/J.BBRC.2009.12.004                                                                                                                                                                                                                                 | 505                      |
| 26. | Steimle PA, Fulcher FK, Patel YM. A novel role for myosin II in insulin-stimulated glucose uptake in 3T3-L1 adipocytes. <i>Biochem Biophys Res Commun.</i> 2005;331(4):1560-5. doi: 10.1016/j.bbrc.2005.04.082.                                                                     | 506<br>507<br>508        |
| 27. | Choi YO, Ryu HJ, Kim HR, Song YS, Kim C, Lee W, Choe H, Leem CH, Jang YJ. Implication of phosphorylation of the myosin II regulatory light chain in insulin-stimulated GLUT4 translocation in 3T3-F442A adipocytes. <i>Exp Mol Med.</i> 2006;38(2):180-189. doi:10.1038/EMM.2006.22 | 509<br>510<br>511<br>512 |
| 28. | Yoshizaki T, Imamura T, Babendure JL, Lu J-C, Sonoda N, Olefsky JM. Myosin 5a Is an Insulin-Stimulated Akt2 (Protein Kinase B $\beta$ ) Substrate Modulating GLUT4 Vesicle Translocation. <i>Mol Cell Biol.</i> 2007;27(14):5172. doi:10.1128/MCB.02298-06                          | 513<br>514<br>515        |
| 29. | Fulcher FK, Smith BT, Russ M, Patel YM. Dual role for myosin II in GLUT4-mediated glucose uptake in 3T3-L1 adipocytes. <i>Exp Cell Res.</i> 2008;314(17):3264-3274. doi:10.1016/J.YEXCR.2008.08.007                                                                                 | 516<br>517<br>518        |
| 30. | Heissler SM, Manstein DJ. Nonmuscle myosin-2: mix and match. <i>Cell Mol Life Sci</i> 2012 701. 2012;70(1):1-21. doi:10.1007/S00018-012-1002-9                                                                                                                                      | 519<br>520               |
| 31. | Wang A, Ma X, Conti MA, Adelstein RS. Distinct and redundant roles of the non-muscle myosin II isoforms and functional domains. <i>Biochem Soc Trans.</i> 2011;39(5):1131. doi:10.1042/BST0391131                                                                                   | 521<br>522<br>523        |
| 32. | Vicente-Manzanares M, Ma X, Adelstein RS, Horwitz AR. Non-muscle myosin II takes centre stage in cell adhesion and migration. <i>Nat Rev Mol Cell Biol</i> 2009 1011. 2009;10(11):778-790. doi:10.1038/nrm2786                                                                      | 524<br>525<br>526        |
| 33. | Burridge K, Guilluy C. Focal adhesions, stress fibers and mechanical tension. <i>Exp Cell Res.</i> 2016;343(1):14. doi:10.1016/J.YEXCR.2015.10.029                                                                                                                                  | 527<br>528               |
| 34. | Kuragano M, Uyeda TQP, Kamijo K, Murakami Y, Takahashi M. Different contributions of nonmuscle myosin IIA and IIB to the organization of stress fiber subtypes in fibroblasts. <i>Mol Biol Cell.</i> 2018 Apr 15;29(8):911-922. doi: 10.1091/mbc.E17-04-0215.                       | 529<br>530<br>531        |
| 35. | Tharp KM, Kang MS, Timblin GA, Saijo K, Kumar S, Stahl Correspondence A. Actomyosin-Mediated Tension Orchestrates Uncoupled Respiration in Adipose Tissues. <i>Cell Metab.</i> 2018;27:602-615. doi:10.1016/j.cmet.2018.02.005                                                      | 532<br>533<br>534        |
| 36. | Al-Sayegh M, Ali H, Jamal MH, ElGindi M, Chanyong T, Al-Awadi K, Abu-Farha M. Mouse Embryonic Fibroblast Adipogenic Potential: A Comprehensive Transcriptome Analysis. <i>Adipocyte.</i> 2021;10(1):1. doi:10.1080/21623945.2020.1859789                                            | 535<br>536<br>537        |
| 37. | Woody S, Stall R, Ramos J, Patel YM. Regulation of Myosin Light Chain Kinase during Insulin-Stimulated Glucose Uptake in 3T3-L1 Adipocytes. <i>PLoS One.</i> 2013;8(10):1-12. doi:10.1371/journal.pone.0077248                                                                      | 538<br>539<br>540        |
| 38. | Bedi D, Dennis JC, Morrison EE, Braden TD, Judd RL. Regulation of intracellular trafficking                                                                                                                                                                                         | 541                      |

|     |                                                                                                                                                                                                                                                                                                                               |                          |
|-----|-------------------------------------------------------------------------------------------------------------------------------------------------------------------------------------------------------------------------------------------------------------------------------------------------------------------------------|--------------------------|
|     | and secretion of adiponectin by myosin II. <i>Biochem Biophys Res Commun.</i> 2017;490(2):202-208. doi:10.1016/j.bbrc.2017.06.021                                                                                                                                                                                             | 542<br>543               |
| 39. | Standaert ML, Galloway L, Karnam P, Bandyopadhyay G, Moscat J, Farese R V. Protein kinase C- $\zeta$ as a downstream effector of phosphatidylinositol 3- kinase during insulin stimulation in rat adipocytes. Potential role in glucose transport. <i>J Biol Chem.</i> 1997;272(48):30075-30082. doi:10.1074/jbc.272.48.30075 | 544<br>545<br>546<br>547 |
| 40. | Bandyopadhyay G, Sajan MP, Kanoh Y, Standaert ML, Quon MJ, Lea-Currie R, Sen A, Farese RV. PKC-zeta mediates insulin effects on glucose transport in cultured preadipocyte-derived human adipocytes. <i>J Clin Endocrinol Metab.</i> 2002;87(2):716-723. doi:10.1210/JCEM.87.2.8252                                           | 548<br>549<br>550<br>551 |
| 41. | Shoham N, Gottlieb R, Sharabani-Yosef O, Zaretsky U, Benayahu D, Gefen A. Static mechanical stretching accelerates lipid production in 3T3-L1 adipocytes by activating the MEK signaling pathway. 2012;302(2):429-441. doi:10.1152/AJPCELL.00167.2011                                                                         | 552<br>553<br>554        |
| 42. | Cohen J, Raviv S, Adir O, Padmanabhan K, Soffer A, Luxenburg C. The Wave complex controls epidermal morphogenesis and proliferation by suppressing Wnt-Sox9 signaling. <i>J Cell Biol.</i> 2019;218(4):1390-1406. doi:10.1083/JCB.201807216                                                                                   | 555<br>556<br>557        |
| 43. | Lim CY, Bi X, Wu D, Kim JB, Gunning PW, Hong W, Han W. Tropomodulin3 is a novel Akt2 effector regulating insulin-stimulated GLUT4 exocytosis through cortical actin remodeling. <i>Nat Commun.</i> 2015;6. doi:10.1038/NCOMMS6951                                                                                             | 558<br>559<br>560        |
| 44. | Schramek D, Sendoel A, Segal JP, Beronja S, Heller E, Oristian D, Reva B, Fuchs E. Direct in vivo RNAi screen unveils myosin IIa as a tumor suppressor of squamous cell carcinomas. <i>Science.</i> 2014;343(6168):309-313. doi:10.1126/SCIENCE.1248627                                                                       | 561<br>562<br>563        |
| 45. | Jiang Y, Yeung JL, Lee JH, An J, Steadman PE, Kim JR, Sung HK. Visualization of 3D White Adipose Tissue Structure Using Whole-mount Staining. <i>J Vis Exp.</i> 2018;2018(141). doi:10.3791/58683                                                                                                                             | 564<br>565<br>566        |
| 46. | Püspöki Z, Storath MK, Sage D, Unser M. Transforms and Operators for Directional Bioimage Analysis: A Survey. <i>Adv Anatomy, Embryol Cell Biol.</i> 2016;219:69-93. doi:10.1007/978-3-319-28549-8_3                                                                                                                          | 567<br>568<br>569        |
| 47. | Steger G. An unbiased detector of curvilinear structures. <i>IEEE Trans Pattern Anal Mach Intell.</i> 1998;20(2):113-125. doi:10.1109/34.659930                                                                                                                                                                               | 570<br>571               |
| 48. | Wagner T, Hiner M, xraynaud. thorstenwagner/ij-ridgedetection: Ridge Detection 1.4.0. Published online August 20, 2017. doi:10.5281/ZENODO.845874                                                                                                                                                                             | 572<br>573               |
| 49. | Kislev N, Egozi M, Benayahu D. Imaging analysis to quantitate the Interplay of membrane and cytoplasm protein dynamics. <i>bioRxiv</i> [Preprint]. Published online December 3, 2021:2021.12.01.470244. doi:10.1101/2021.12.01.470244                                                                                         | 574<br>575<br>576        |
| 50. | Arganda-Carreras I, Kaynig V, Rueden C, Eliceiri KW, Schindelin J, Cardona A, Sebastian Seung H. Trainable Weka Segmentation: a machine learning tool for microscopy pixel                                                                                                                                                    | 577<br>578               |



|     |                                                                                                                                                                                                                                                                                                                                          |                          |
|-----|------------------------------------------------------------------------------------------------------------------------------------------------------------------------------------------------------------------------------------------------------------------------------------------------------------------------------------------|--------------------------|
|     | classification. <i>Bioinformatics</i> . 2017;33(15):2424-2426.                                                                                                                                                                                                                                                                           | 579                      |
|     | doi:10.1093/BIOINFORMATICS/BTX180                                                                                                                                                                                                                                                                                                        | 580                      |
| 51. | Lustig M, Feng Q, Payan Y, Gefen A, Benayahu D. Noninvasive continuous monitoring of adipocyte differentiation: From macro to micro scales. <i>Microsc Microanal</i> . 2019;25(1):119-128. doi:10.1017/S1431927618015520                                                                                                                 | 581<br>582<br>583        |
| 52. | Livak KJ, Schmittgen TD. Analysis of relative gene expression data using real-time quantitative PCR and the 2(-Delta Delta C(T)) Method. <i>Methods</i> . 2001;25(4):402-408. doi:10.1006/METH.2001.1262                                                                                                                                 | 584<br>585<br>586        |
| 53. | Park CY, Krishnan A, Zhu Q, Wong AK, Lee YS, Troyanskaya OG. Tissue-aware data integration approach for the inference of pathway interactions in metazoan organisms. <i>Bioinformatics</i> . 2015;31(7):1093-1101. doi:10.1093/BIOINFORMATICS/BTU786                                                                                     | 587<br>588<br>589        |
| 54. | Carbon S, Ireland A, Mungall CJ, Shu S, Marshall B, Lewis S. AmiGO: online access to ontology and annotation data. <i>Bioinformatics</i> . 2009;25(2):288-289. doi:10.1093/BIOINFORMATICS/BTN615                                                                                                                                         | 590<br>591<br>592        |
| 55. | shburner M, Ball CA, Blake JA, Botstein D, Butler H, Cherry JM, Davis AP, Dolinski K, Dwight SS, Eppig JT, Harris MA, Hill DP, Issel-Tarver L, Kasarskis A, Lewis S, Matese JC, Richardson JE, Ringwald M, Rubin GM, Sherlock G. Gene Ontology: tool for the unification of biology. <i>Nat Genet</i> . 2000;25(1):25. doi:10.1038/75556 | 593<br>594<br>595<br>596 |
| 56. | Gene Ontology Consortium. The Gene Ontology resource: enriching a GOld mine. <i>Nucleic Acids Res</i> . 2021;49(D1):D325-D334. doi:10.1093/NAR/GKAA1113                                                                                                                                                                                  | 597<br>598               |
| 57. | Discher DE, Janmey P, Wang YL. Tissue cells feel and respond to the stiffness of their substrate. <i>Science (80- )</i> . 2005;310(5751):1139-1143. doi:10.1126/SCIENCE.1116995                                                                                                                                                          | 599<br>600               |
| 58. | Chen L, Hu H, Qiu W, Shi K, Kassem M. Actin depolymerization enhances adipogenic differentiation in human stromal stem cells. <i>Stem Cell Res</i> . 2018;29:76-83. doi:10.1016/j.scr.2018.03.010                                                                                                                                        | 601<br>602<br>603        |
| 59. | Zang J-H, Cavet G, Sabry JH, Wagner P, Moores SL, Spudich JA. On the Role of Myosin-II in Cytokinesis: Division of Dictyostelium Cells under Adhesive and Nonadhesive Conditions. <i>Mol Biol Cell</i> . 1997;8(12):2617. doi:10.1091/MBC.8.12.2617                                                                                      | 604<br>605<br>606        |
| 60. | Elliott H, Fischer RS, Myers KA, Desai RA, Gao L, Chen CS, Adelstein RS, Waterman CM, Danuser G. Myosin II controls cellular branching morphogenesis and migration in three dimensions by minimizing cell-surface curvature. <i>Nat Cell Biol</i> 2014 172. 2015;17(2):137-147. doi:10.1038/ncb3092                                      | 607<br>608<br>609<br>610 |
| 61. | Clark AG, Wartlick O, Salbreux G, Paluch EK. Stresses at the cell surface during animal cell morphogenesis. <i>Curr Biol</i> . 2014;24(10):R484-R494. doi:10.1016/j.cub.2014.03.059                                                                                                                                                      | 611<br>612               |
| 62. | Franke WW, Hergt M, Grund C. Rearrangement of the vimentin cytoskeleton during adipose conversion: formation of an intermediate filament cage around lipid globules. <i>Cell</i> . 1987;49(1):131-141. doi:10.1016/0092-8674(87)90763-X                                                                                                  | 613<br>614<br>615        |

63. Audano M, Pedretti S, Ligorio S, Gualdrini F, Polletti S, Russo M, Ghisletti S, Bean C, Crestani M, Caruso D, De Fabiani E, Mitro N. Zc3h10 regulates adipogenesis by controlling translation and F-actin/mitochondria interaction. *J Cell Biol.* 2021;220(3). doi:10.1083/JCB.202003173 616  
617  
618  
619
64. Lo C-M, Buxton DB, Chua GCH, Dembo M, Adelstein RS, Wang Y-L. Nonmuscle Myosin IIB Is Involved in the Guidance of Fibroblast Migration. *Mol Biol Cell.* 2003;15(3):982-989. doi:10.1091/MBC.E03-06-0359 620  
621  
622
65. Beadle C, Assanah MC, Monzo P, Vallee R, Rosenfeld SS, Canoll P. The Role of Myosin II in Glioma Invasion of the Brain. *Mol Biol Cell.* 2008;19(8):3357-3368. doi:10.1091/MBC.E08-03-0319 623  
624  
625
66. Sandquist JC, Swenson KI, DeMali KA, BurrIDGE K, Means AR. Rho Kinase Differentially Regulates Phosphorylation of Nonmuscle Myosin II Isoforms A and B during Cell Rounding and Migration. *J Biol Chem.* 2006;281(47):35873-35883. doi:10.1074/JBC.M605343200 626  
627  
628  
629
67. Tullio AN, Accili D, Ferrans VJ, Yu ZX, Takeda K, Grinberg A, Westphal H, Preston YA, Adelstein RS. Nonmuscle myosin II-B is required for normal development of the mouse heart. *Proc Natl Acad Sci U S A.* 1997;94(23):12407-12412. doi:10.1073/PNAS.94.23.12407 630  
631  
632  
633
68. Takeda K, Kishi H, Ma X, Yu Z-X, Adelstein RS. Ablation and Mutation of Nonmuscle Myosin Heavy Chain II-B Results in a Defect in Cardiac Myocyte Cytokinesis. *Circ Res.* 2003;93(4):330-337. doi:10.1161/01.RES.0000089256.00309.CB 634  
635  
636
69. Ma X, Kawamoto S, Hara Y, Adelstein RS. A point mutation in the motor domain of nonmuscle myosin II-B impairs migration of distinct groups of neurons. *Mol Biol Cell.* 2004;15(6):2568-2579. doi:10.1091/MBC.E03-11-0836 637  
638  
639
70. Kim HT, Yin W, Jin YJ, Panza P, Gunawan F, Grohmann B, Buettner C, Sokol AM, Preussner J, Guenther S, Kostin S, Ruppert C, Bhagwat AM, Ma X, Graumann J, Looso M, Guenther A, Adelstein RS, Offermanns S, Stainier DYR. Myh10 deficiency leads to defective extracellular matrix remodeling and pulmonary disease. *Nat Commun* 2018 91. 2018;9(1):1-13. doi:10.1038/s41467-018-06833-7 640  
641  
642  
643  
644
71. Recuenco MC, Ohmori T, Tanigawa S, Taguchi A, Fujimura S, Conti MA, Wei Q, Kiyonari H, Abe T, Adelstein RS, Nishinakamura R. Nonmuscle Myosin II Regulates the Morphogenesis of Metanephric Mesenchyme-Derived Immature Nephrons. *J Am Soc Nephrol.* 2015;26(5):1081. doi:10.1681/ASN.2014030281 645  
646  
647  
648
72. Ma X, Adelstein RS. A Point Mutation in Myh10 Causes Major Defects in Heart Development and Body Wall Closure. *Circ Cardiovasc Genet.* 2014;7(3):257-265. doi:10.1161/CIRCGENETICS.113.000455 649  
650  
651
73. Cheung SY, Sayeed M, Nakuluri K, Li L, Feldman BJ. MYH9 facilitates autoregulation of adipose tissue depot development. *JCI Insight.* 2021;6(9). doi:10.1172/jci.insight.136233 652  
653

74. Wasik AA, Dumont V, Tienari J, Nyman TA, Fogarty CL, Forsblom C, Lehto M, Lehtonen E, Groop PH, Lehtonen S. Septin 7 reduces nonmuscle myosin IIA activity in the SNAP23 complex and hinders GLUT4 storage vesicle docking and fusion. *Exp Cell Res.* 2017;350(2):336-348. doi:10.1016/j.yexcr.2016.12.010
75. Stall R, Ramos J, Kent Fulcher F, Patel YM. Regulation of myosin IIA and filamentous actin during insulin-stimulated glucose uptake in 3T3-L1 adipocytes. *Exp Cell Res.* 2014;322(1):81-88. doi:10.1016/J.YEXCR.2013.12.011
76. Kim S, Moustaid-Moussa N. Secretory, Endocrine and Autocrine/Paracrine Function of the Adipocyte. *J Nutr.* 2000;130(12):3110S-3115S. doi:10.1093/JN/130.12.3110S
77. Hemmingsen M, Vedel S, Skaftte-Pedersen P, Sabourin D, Collas P, Bruus H, Dufva M. The Role of Paracrine and Autocrine Signaling in the Early Phase of Adipogenic Differentiation of Adipose-derived Stem Cells. *PLoS One.* 2013;8(5):e63638. doi:10.1371/JOURNAL.PONE.0063638
78. Garcia NA, Moncayo-Arlandi J, Sepulveda P, Diez-Juan A. Cardiomyocyte exosomes regulate glycolytic flux in endothelium by direct transfer of GLUT transporters and glycolytic enzymes. *Cardiovasc Res.* 2016;109(3):397-408. doi:10.1093/CVR/CVV260
79. Even-Faitelson L, Ravid S. PAK1 and aPKC $\zeta$  Regulate Myosin II-B Phosphorylation: A Novel Signaling Pathway Regulating Filament Assembly. *Mol Biol Cell.* 2006;17(7):2869. doi:10.1091/MBC.E05-11-1001
80. van Leeuwen FN, van Delft S, Kain HE, van der Kammen RA, Collard JG. Rac regulates phosphorylation of the myosin-II heavy chain, actinomyosin disassembly and cell spreading. *Nat Cell Biol* 1999 14. 1999;1(4):242-248. doi:10.1038/12068
81. Straussman R, Even L, Ravid S. Myosin II heavy chain isoforms are phosphorylated in an EGF-dependent manner: involvement of protein kinase C. *J Cell Sci.* 2001 Aug;114(Pt 16):3047-57.
82. Dulyaninova NG, House RP, Betapudi V, Bresnick AR. Myosin-IIA Heavy-Chain Phosphorylation Regulates the Motility of MDA-MB-231 Carcinoma Cells. *Mol Biol Cell.* 2007;18(8):3144-3155. doi:10.1091/MBC.E06-11-1056
83. Sabry JH, Moores SL, Ryan S, Zang JH, Spudich JA. Myosin heavy chain phosphorylation sites regulate myosin localization during cytokinesis in live cells. *Mol Biol Cell.* 1997;8(12):2605-2615. doi:10.1091/MBC.8.12.2605
84. Dulyaninova NG, Bresnick AR. The heavy chain has its day: regulation of myosin-II assembly. *Bioarchitecture.* 2013;3(4):77-85. doi:10.4161/BIOA.26133
85. Liu XJ, Yang C, Gupta N, Zuo J, Chang YS, Fang FD. Protein kinase C-zeta regulation of GLUT4 translocation through actin remodeling in CHO cells. *J Mol Med (Berl).* 2007;85(8):851-861. doi:10.1007/S00109-007-0232-Z
86. Uberall F, Hellbert K, Kampfer S, Maly K, Villunger A, Spitaler M, Mwanjewe J, Baier-

|     |                                                                                                                                                                                                                                                                                                                      |                          |
|-----|----------------------------------------------------------------------------------------------------------------------------------------------------------------------------------------------------------------------------------------------------------------------------------------------------------------------|--------------------------|
|     | Bitterlich G, Baier G, Grunicke HH. Evidence That Atypical Protein Kinase C- $\lambda$ and Atypical Protein Kinase C- $\zeta$ Participate in Ras-mediated Reorganization of the F-actin Cytoskeleton. <i>J Cell Biol.</i> 1999;144(3):413-425. doi:10.1083/JCB.144.3.413                                             | 691<br>692<br>693        |
| 87. | Liu LZ, Zhao HL, Zuo J, Ho SK, Chan JC, Meng Y, Fang FD, Tong PC. Protein Kinase C $\zeta$ Mediates Insulin-induced Glucose Transport through Actin Remodeling in L6 Muscle Cells. <i>Mol Biol Cell.</i> 2006;17(5):2322. doi:10.1091/MBC.E05-10-0969                                                                | 694<br>695<br>696        |
| 88. | Juanes-Garcia A, Chapman JR, Aguilar-Cuenca R, Delgado-Arevalo C, Hodges J, Whitmore LA, Shabanowitz J, Hunt DF, Horwitz AR, Vicente-Manzanares M. A regulatory motif in nonmuscle myosin II-B regulates its role in migratory front-back polarity. <i>J Cell Biol.</i> 2015;209(1):23-32. doi:10.1083/JCB.201407059 | 697<br>698<br>699<br>700 |
| 89. | Gomes ER, Jani S, Gundersen GG. Nuclear Movement Regulated by Cdc42, MRCK, Myosin, and Actin Flow Establishes MTOC Polarization in Migrating Cells. <i>Cell.</i> 2005;121(3):451-463. doi:10.1016/J.CELL.2005.02.022                                                                                                 | 701<br>702<br>703        |
| 90. | Schiffhauer ES, Ren Y, Iglesias VA, Kothari P, Iglesias PA, Robinson DN. Myosin IIB assembly state determines its mechanosensitive dynamics. <i>J Cell Biol.</i> 2019;218(3):895-908. doi:10.1083/JCB.201806058                                                                                                      | 704<br>705<br>706<br>707 |

**A**

bioRxiv preprint doi: <https://doi.org/10.1101/2021.12.07.471535>; this version posted December 7, 2021. The copyright holder for this preprint (which was not certified by peer review) is the author/funder. All rights reserved. No reuse allowed without permission.

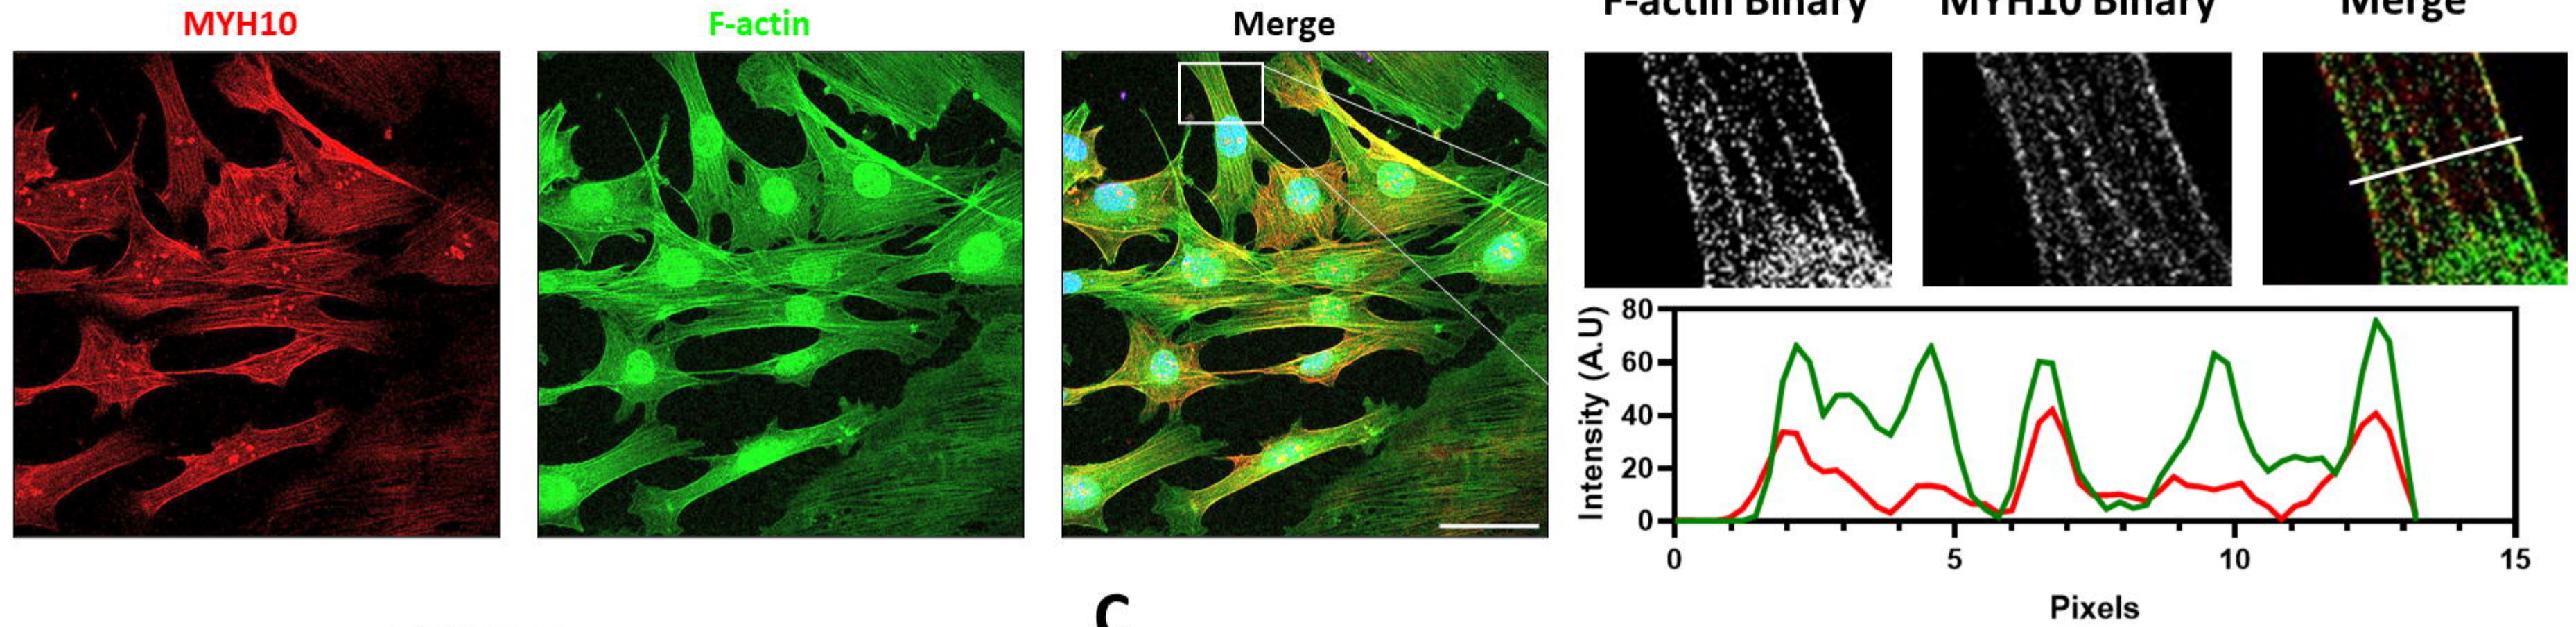**B**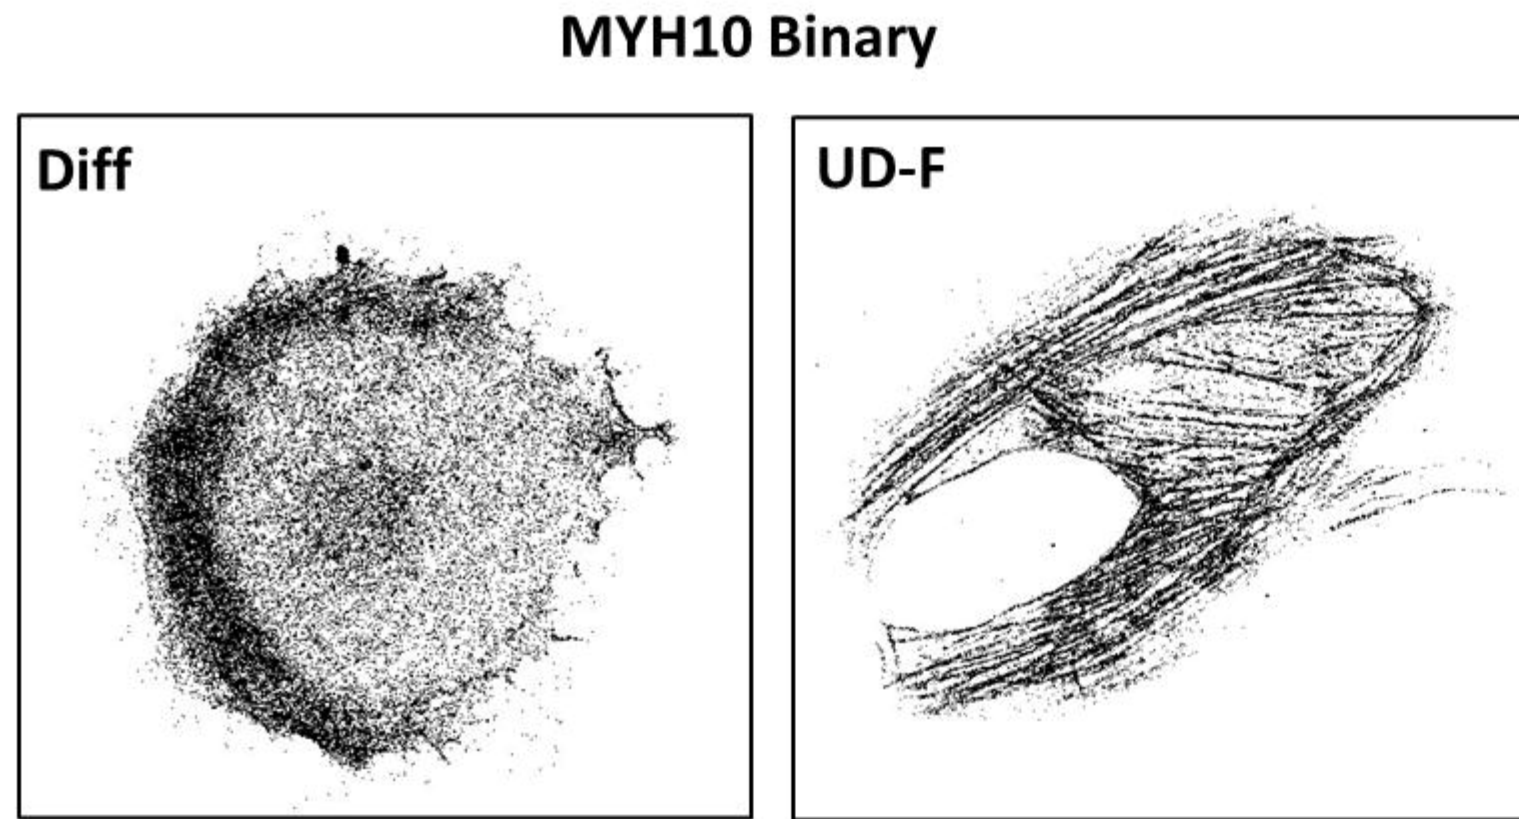**C**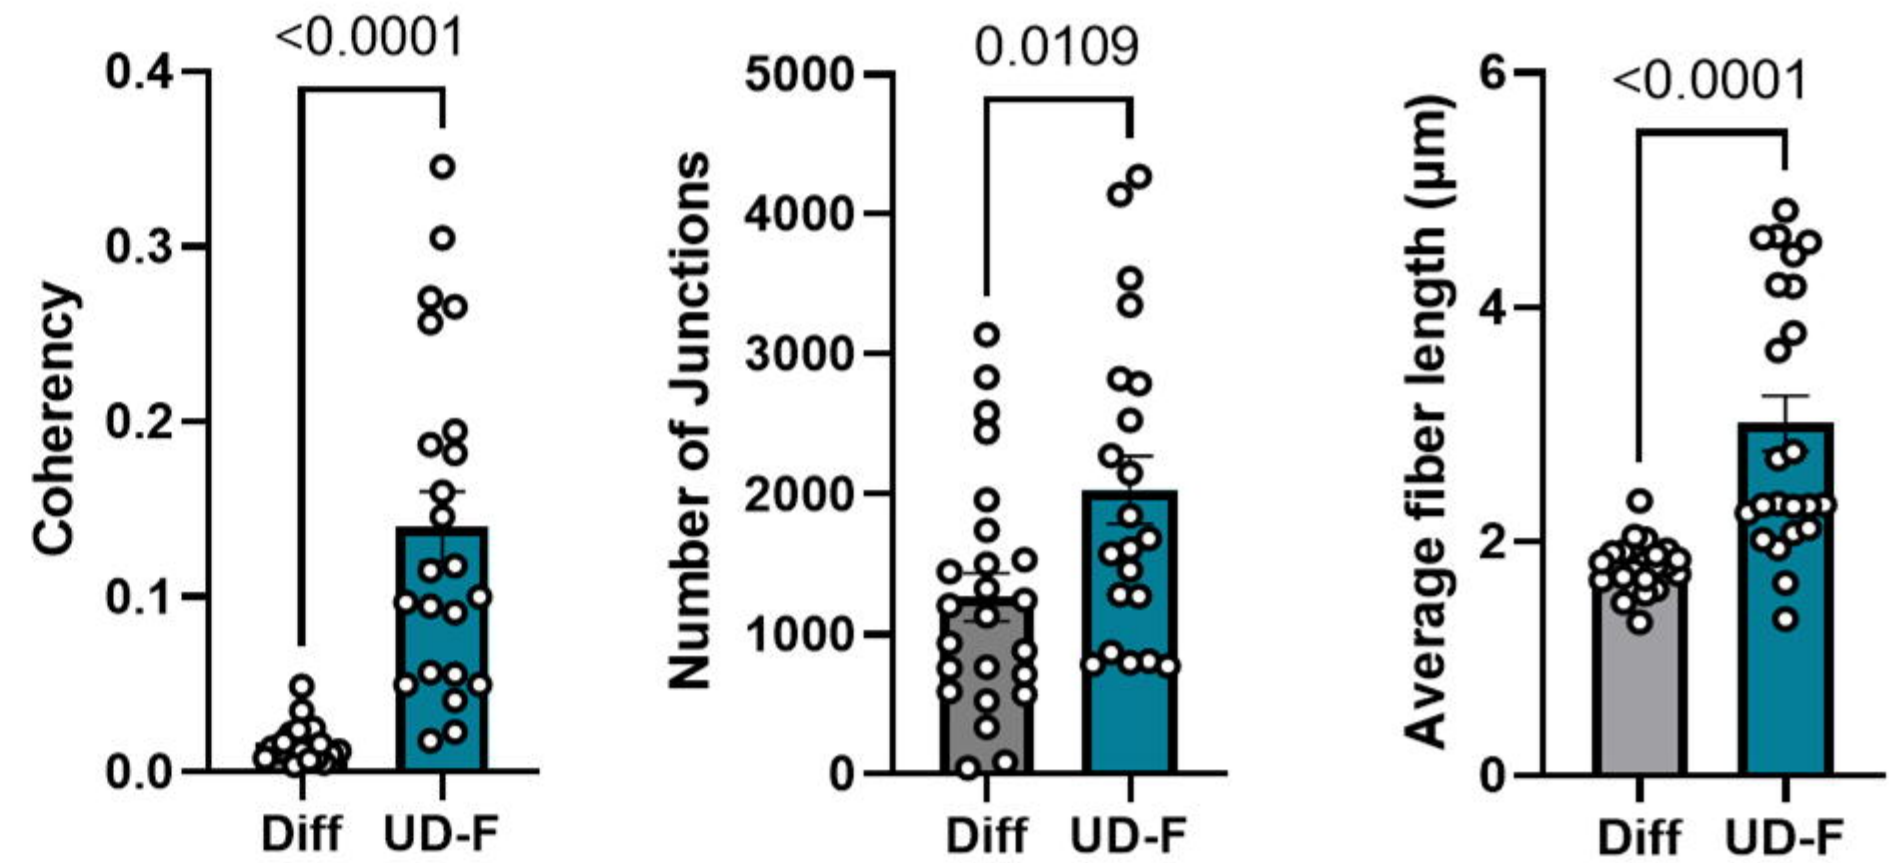

**A**

bioRxiv preprint doi: <https://doi.org/10.1101/2021.12.07.471535>; this version posted December 7, 2021. The copyright holder for this preprint (which was not certified by peer review) is the author/funder. All rights reserved. No reuse allowed without permission.

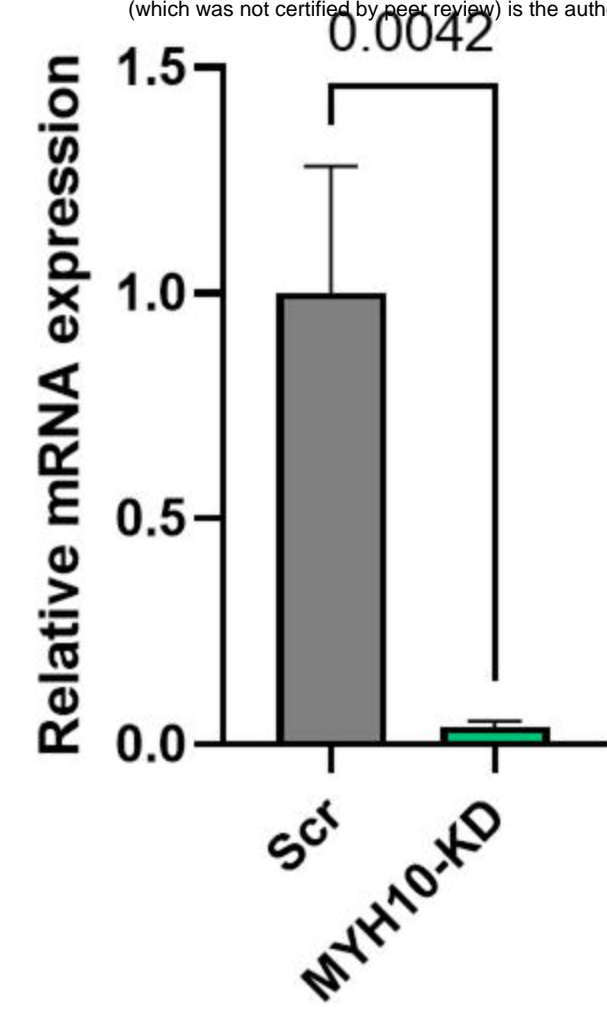**B**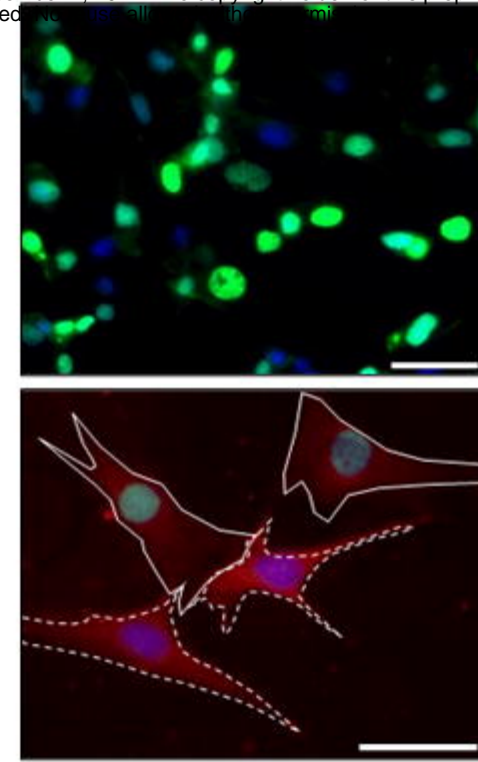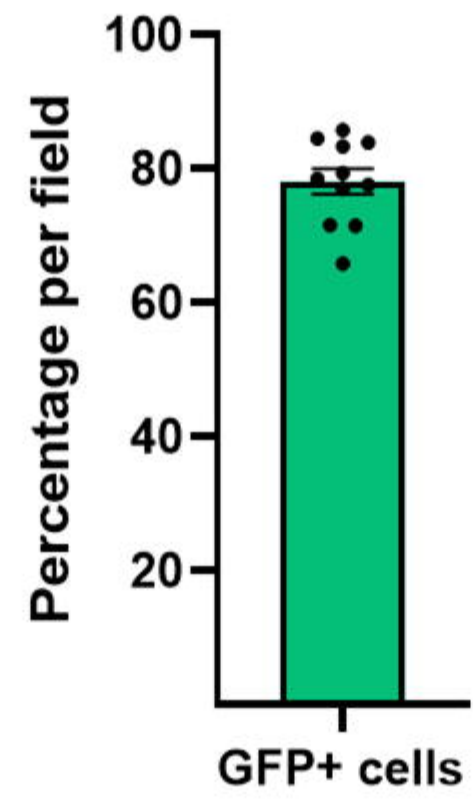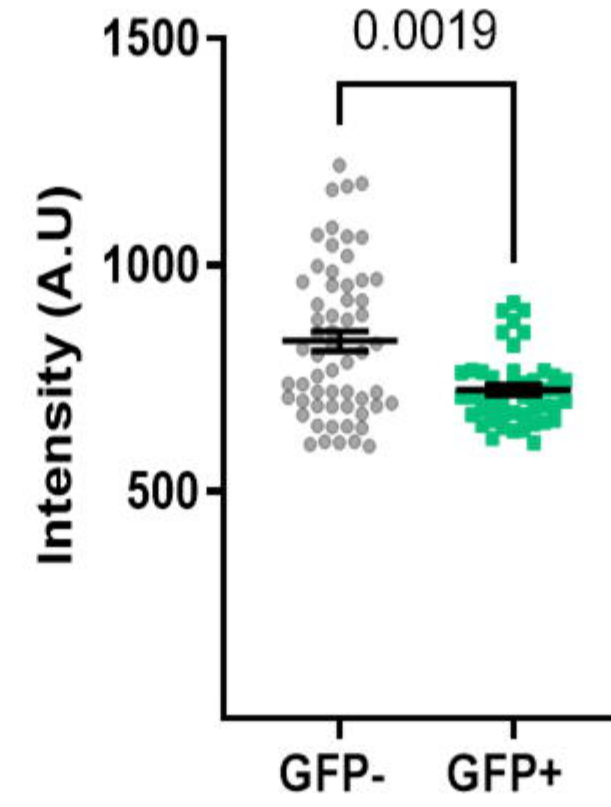

**A**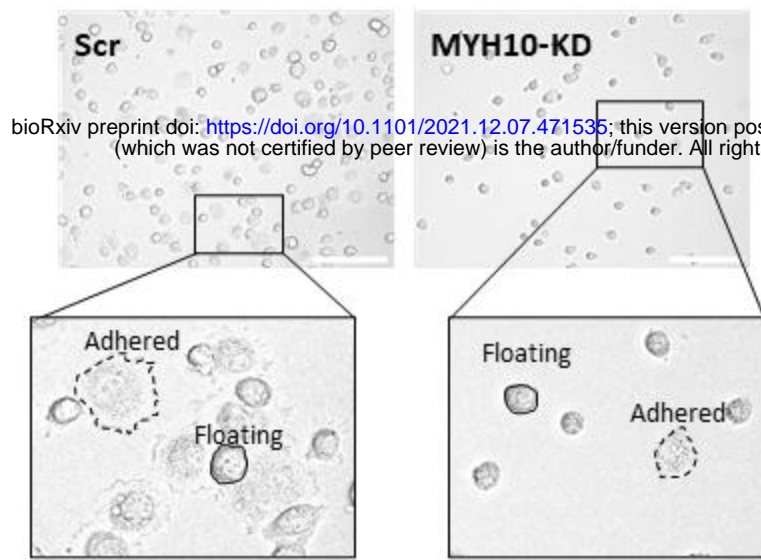**B**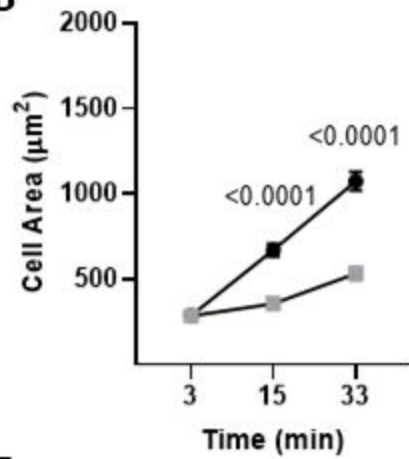**C**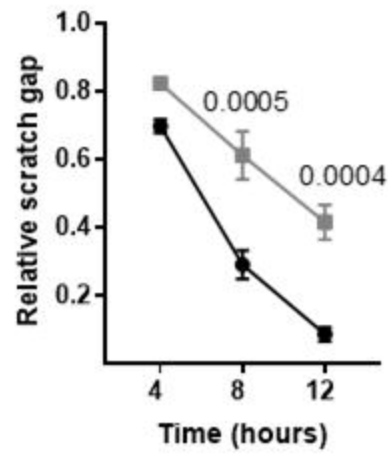**E**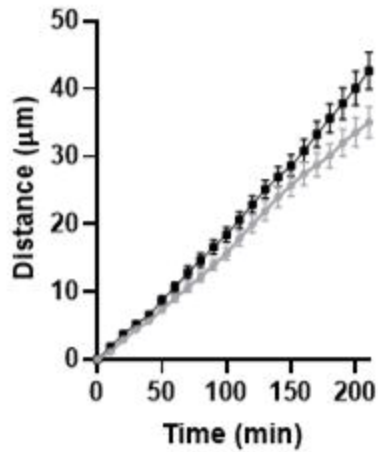**F**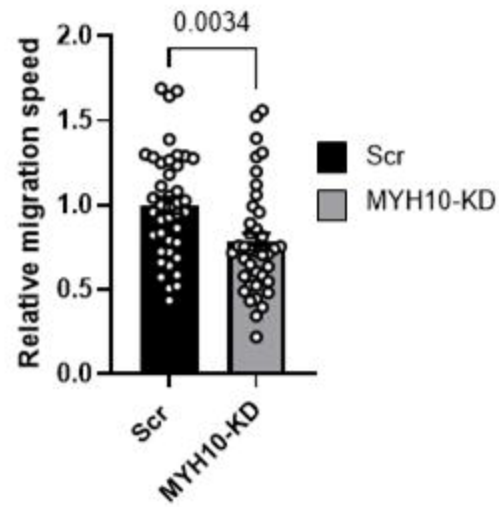**D**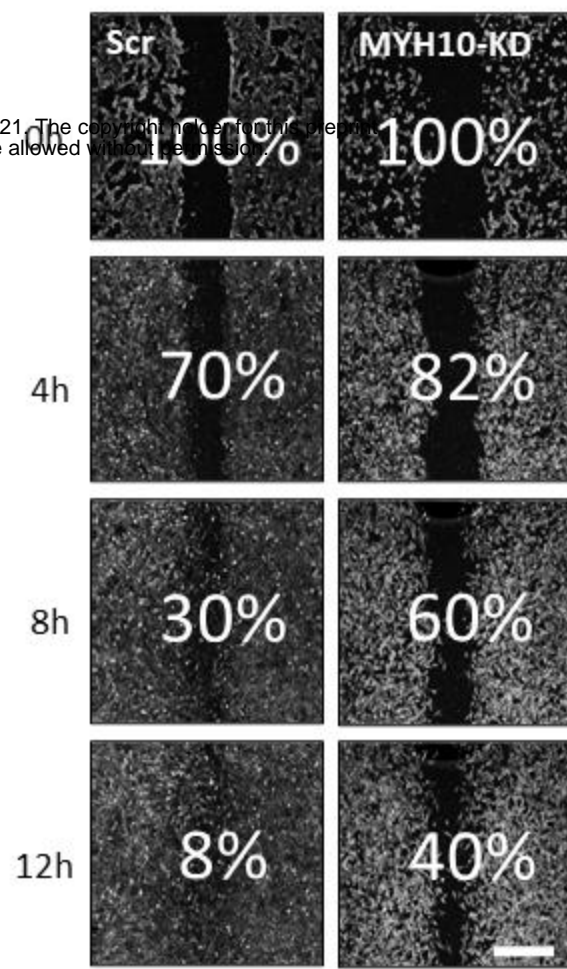**G**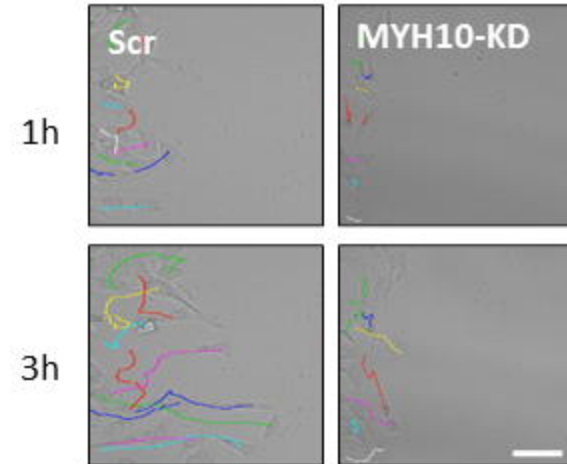

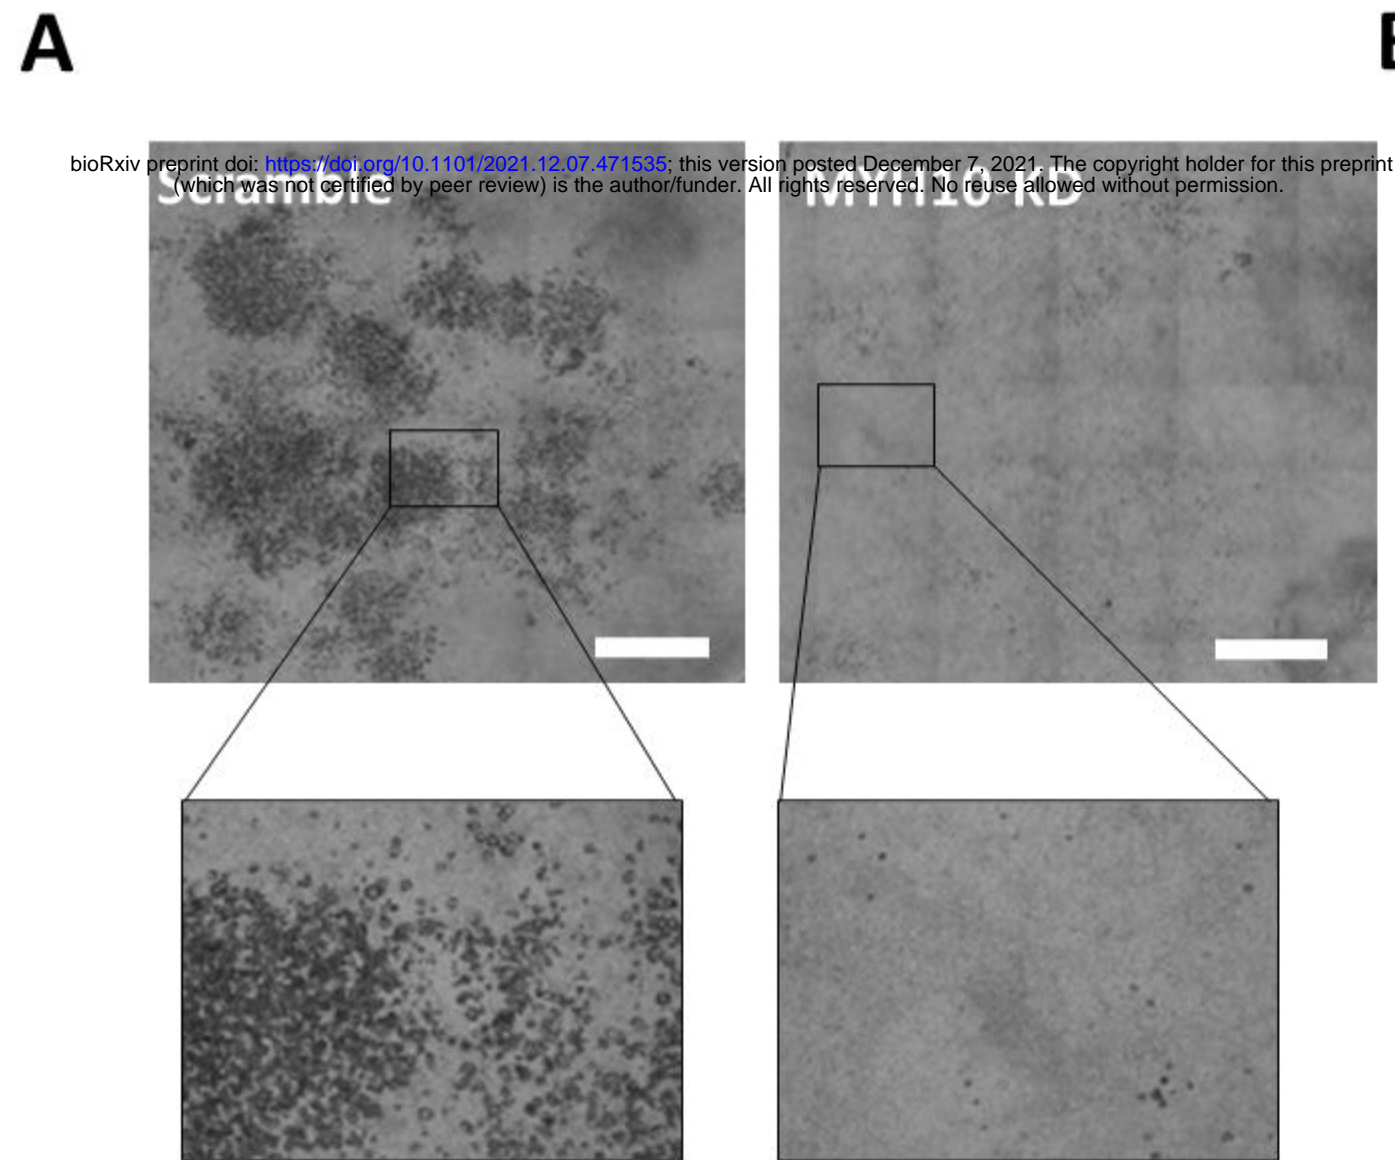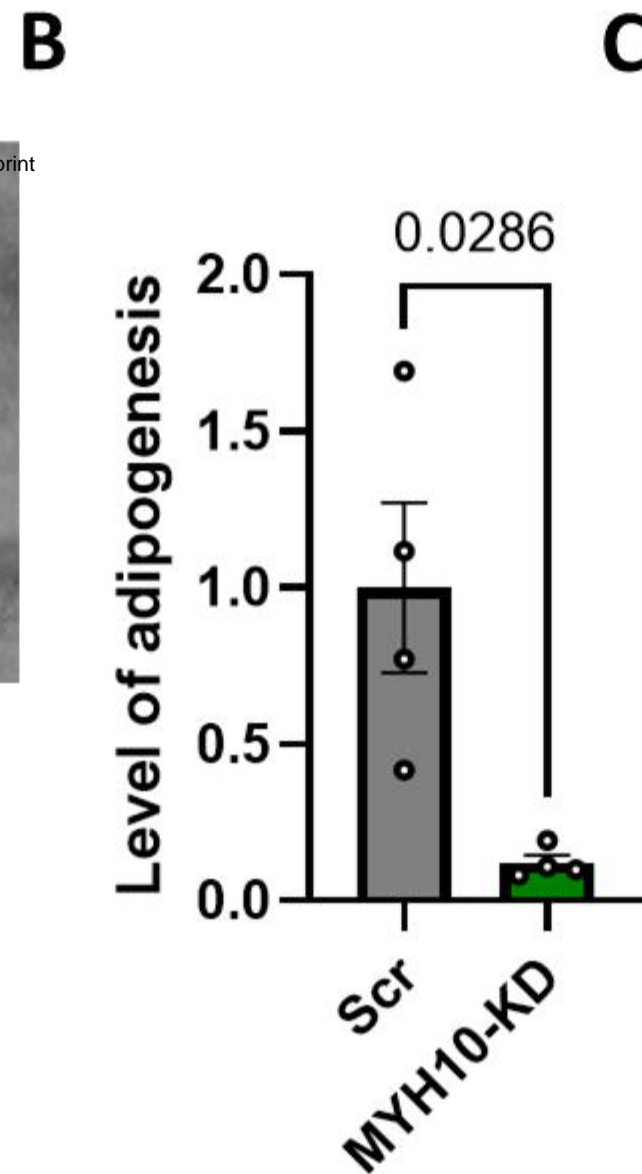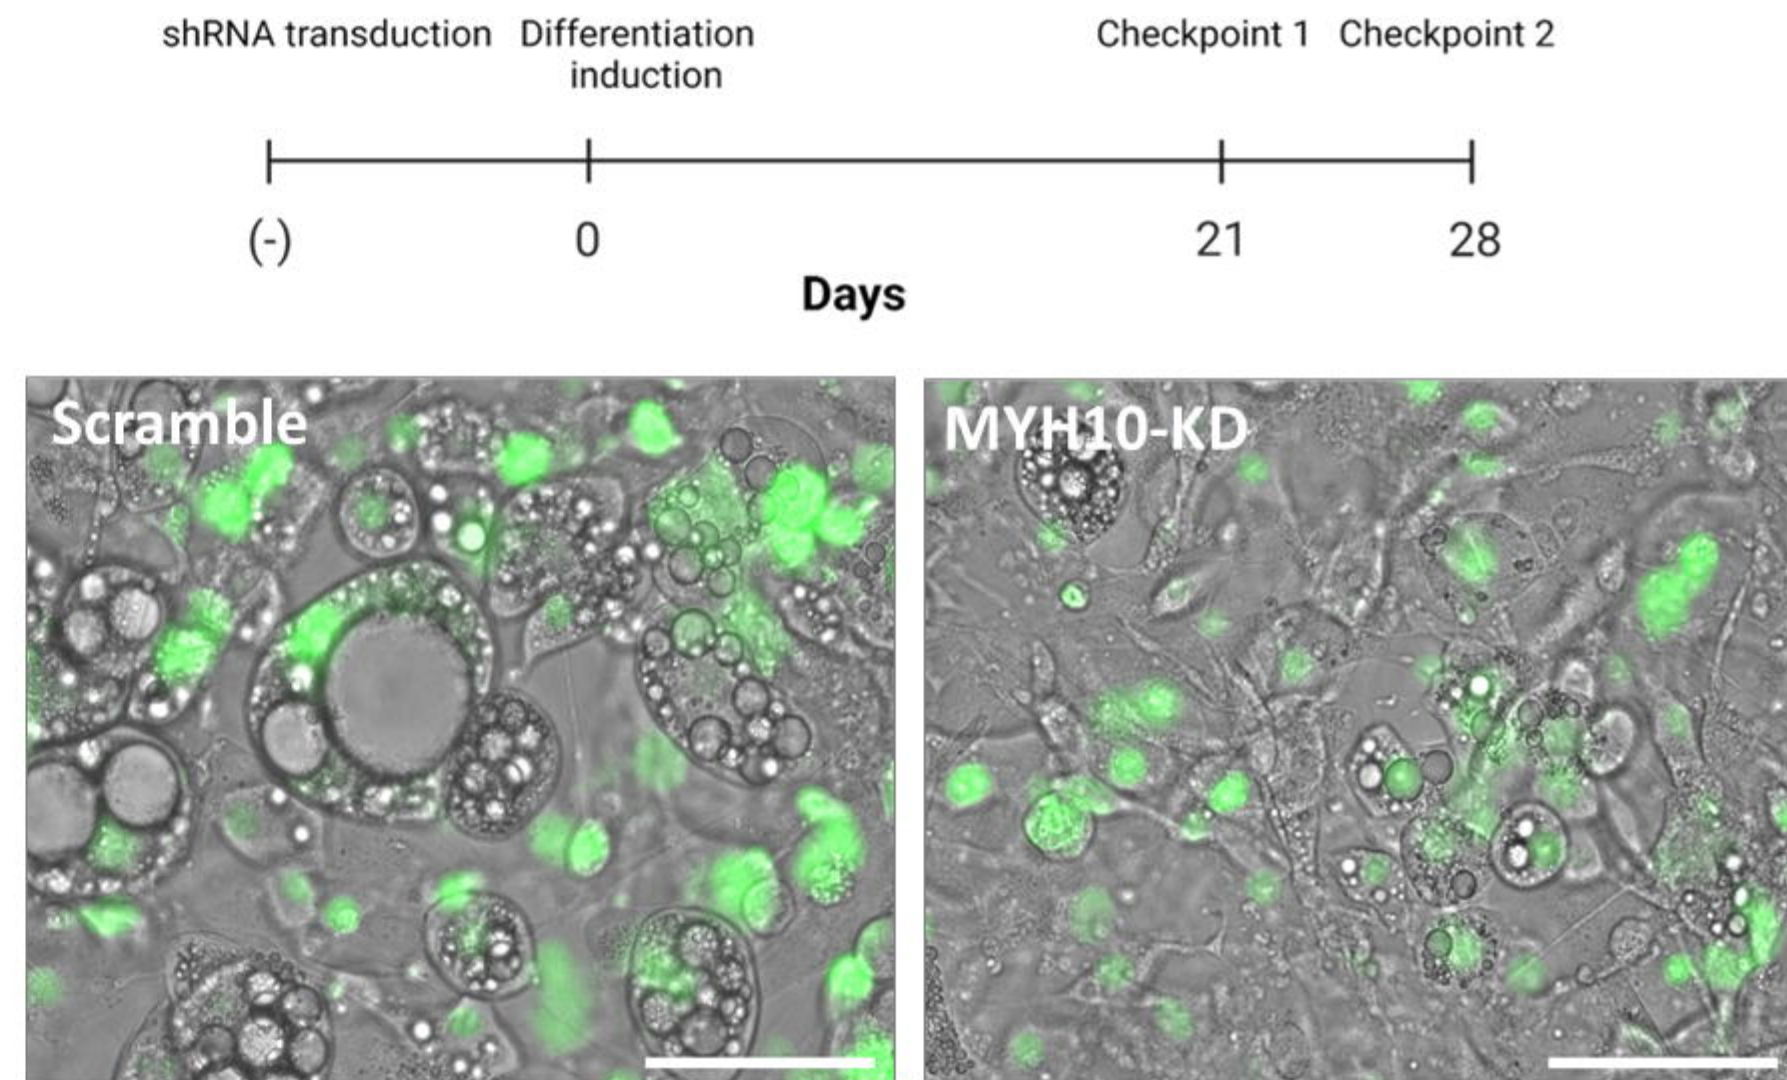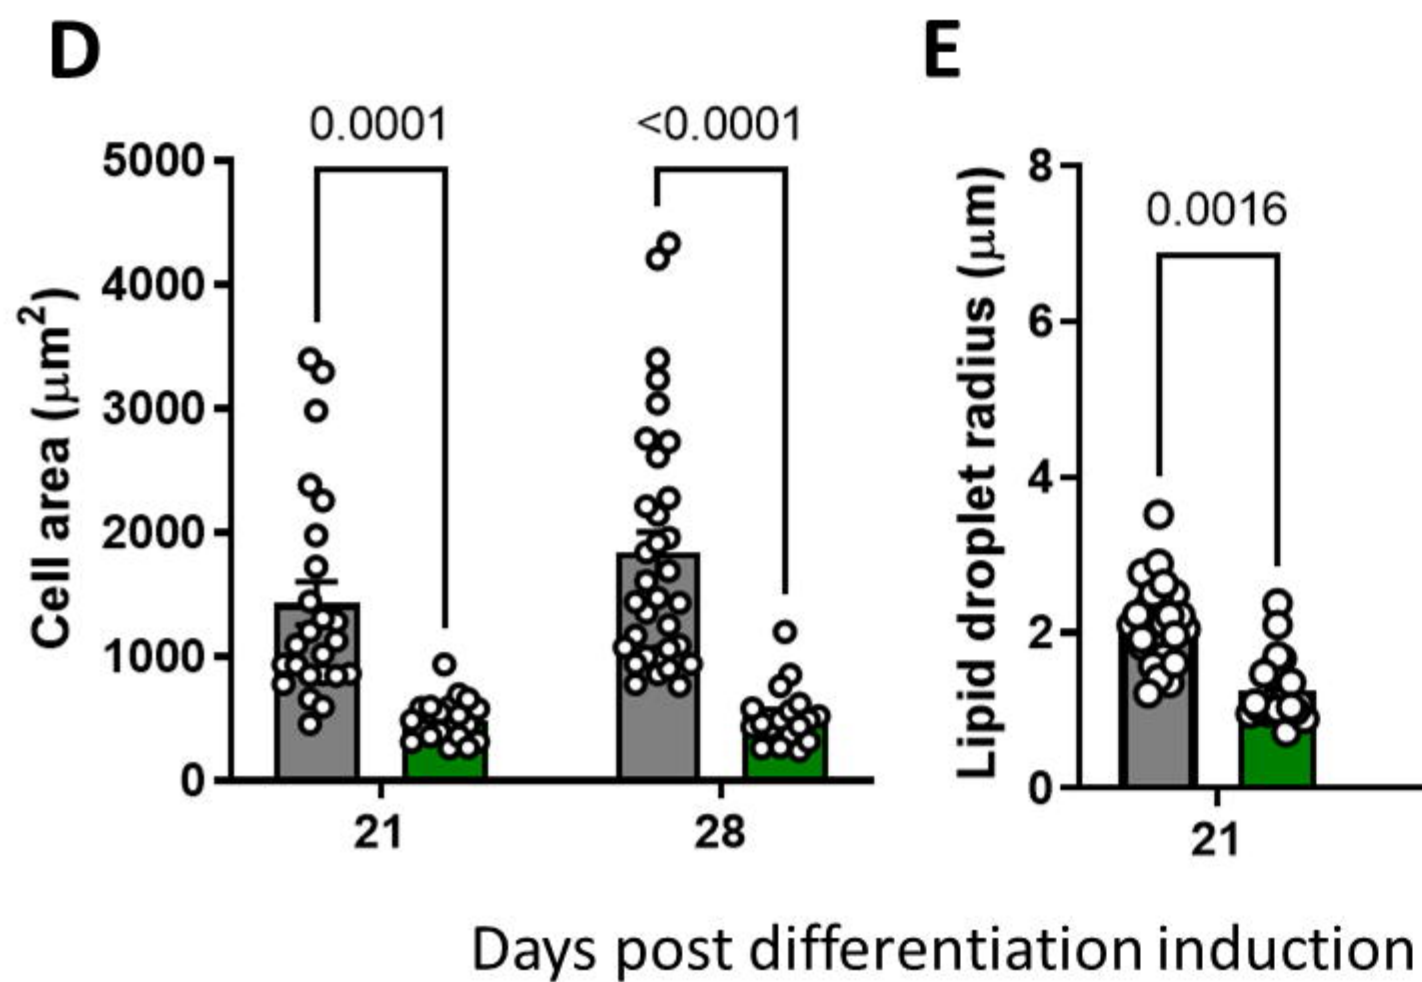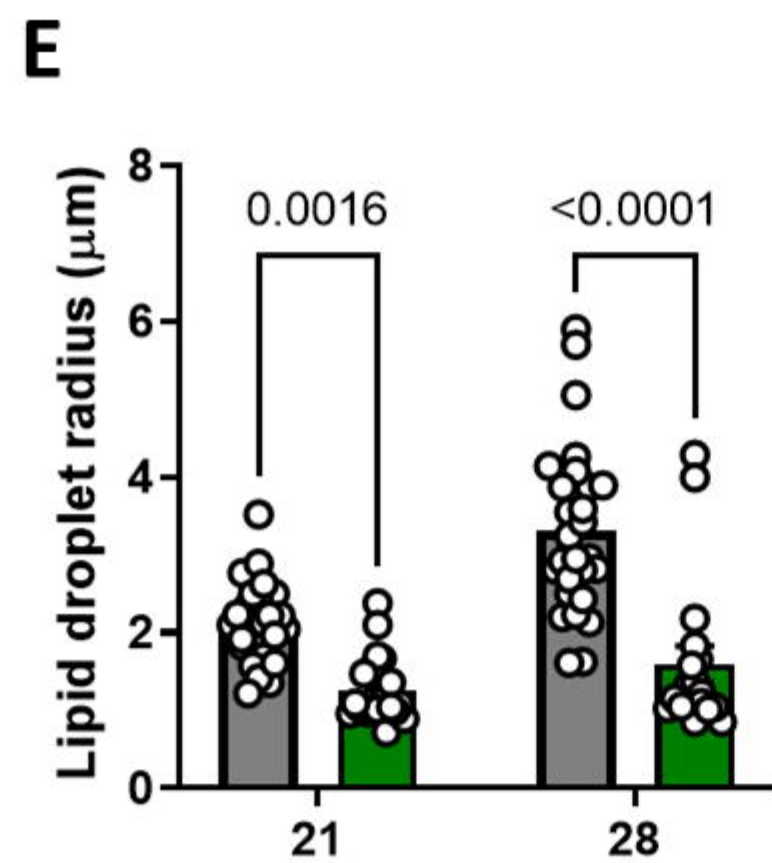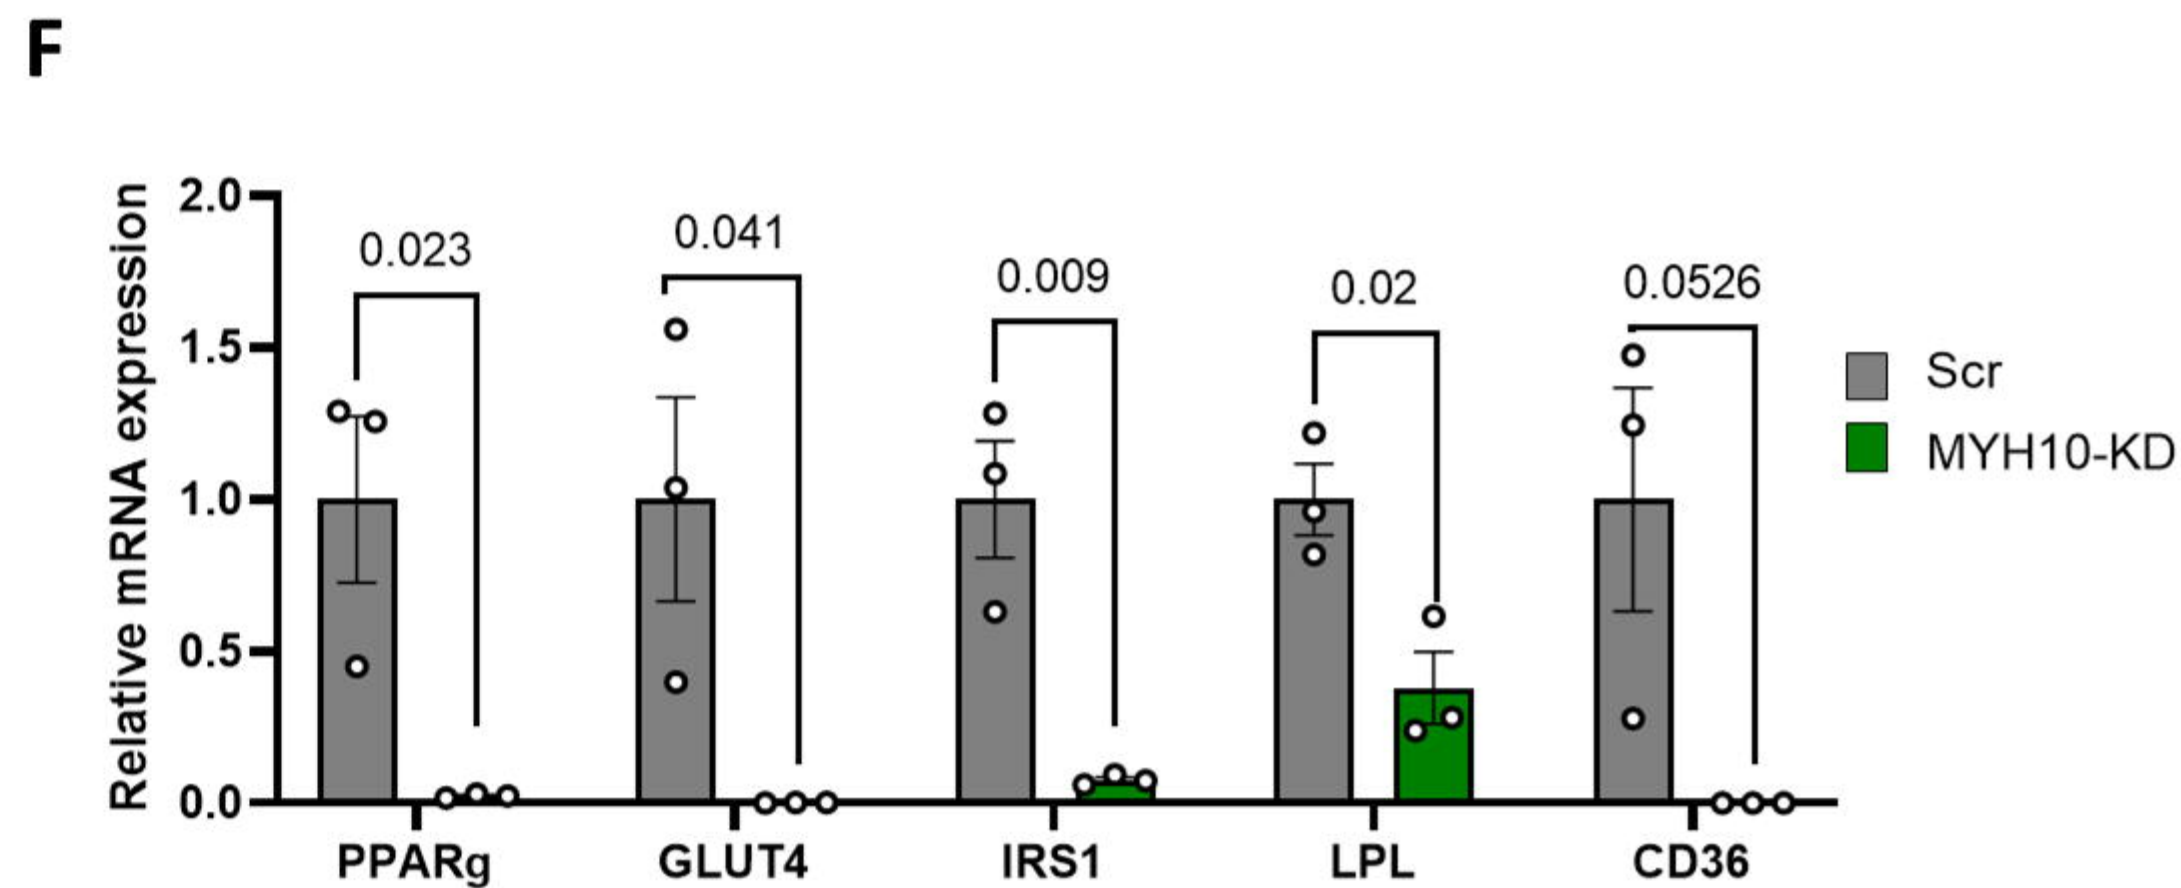



**A****VAT (In vivo)**

MYH10

GLUT4

MYH10 GLUT4

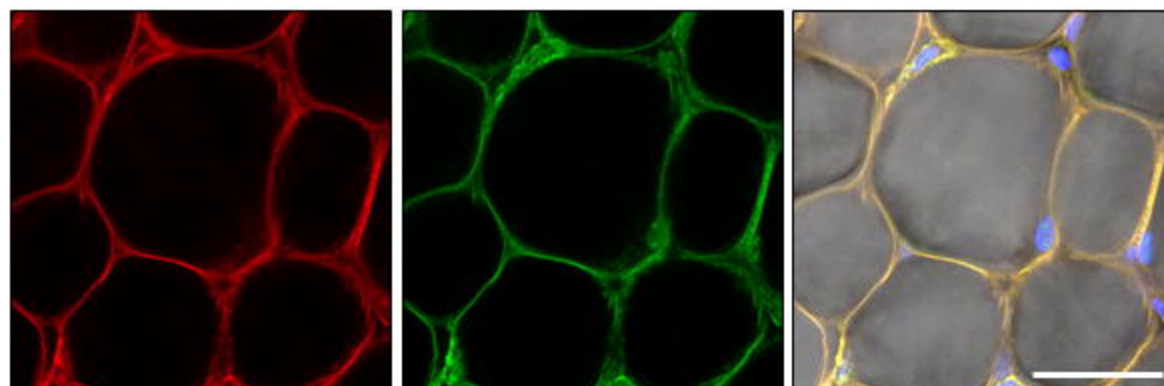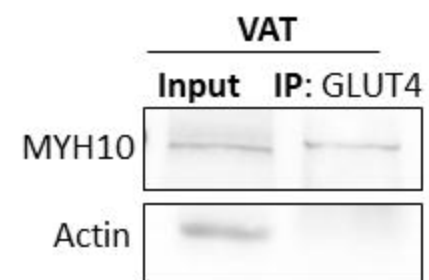**B****3T3-L1 (In vitro)**

MYH10

GLUT4

MYH10 GLUT4

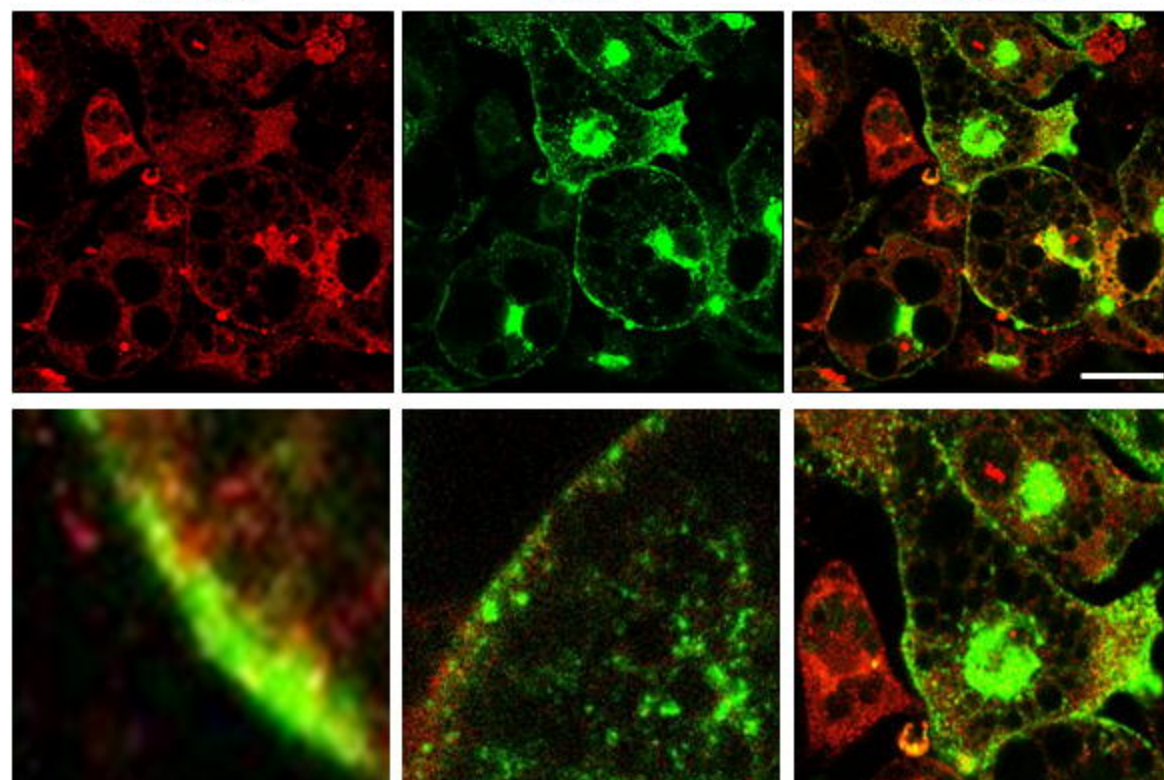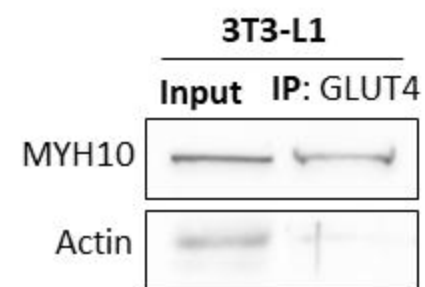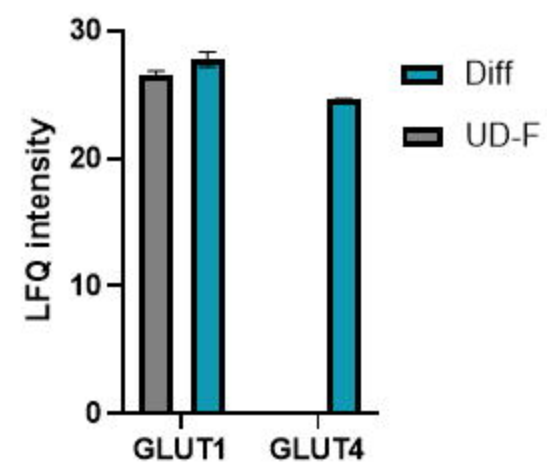

**A**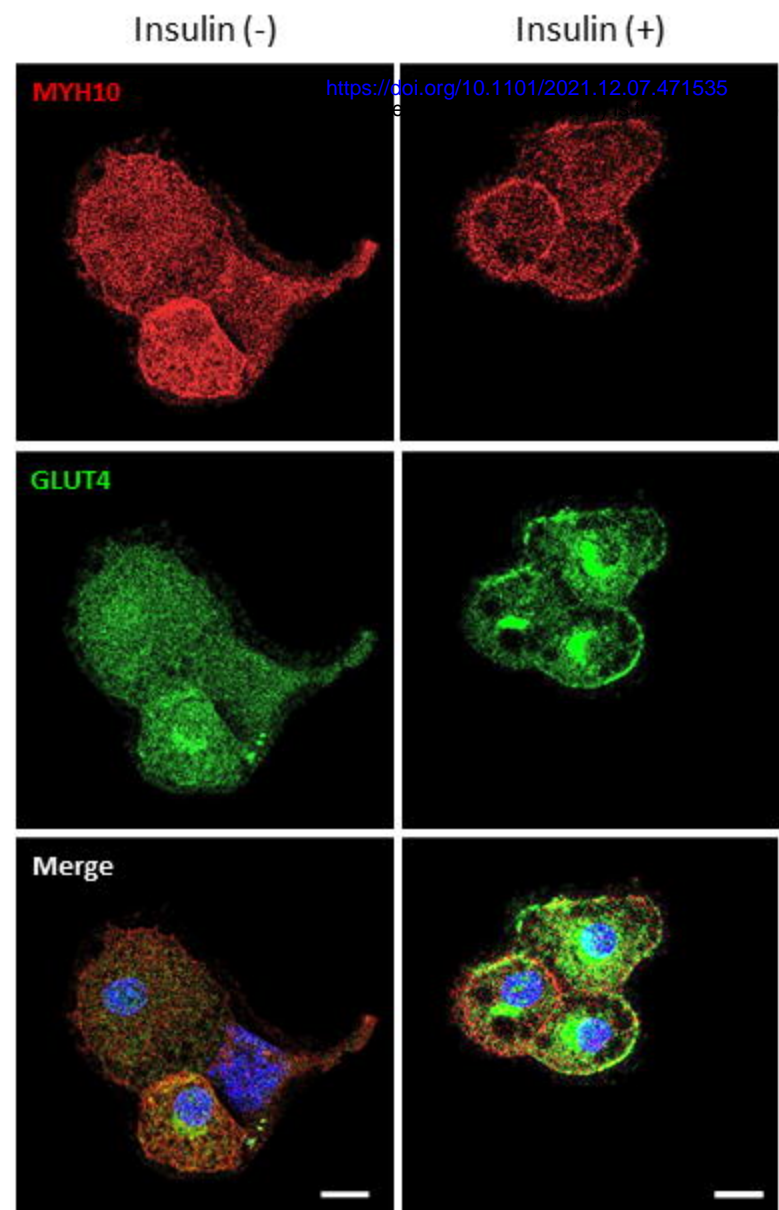**B**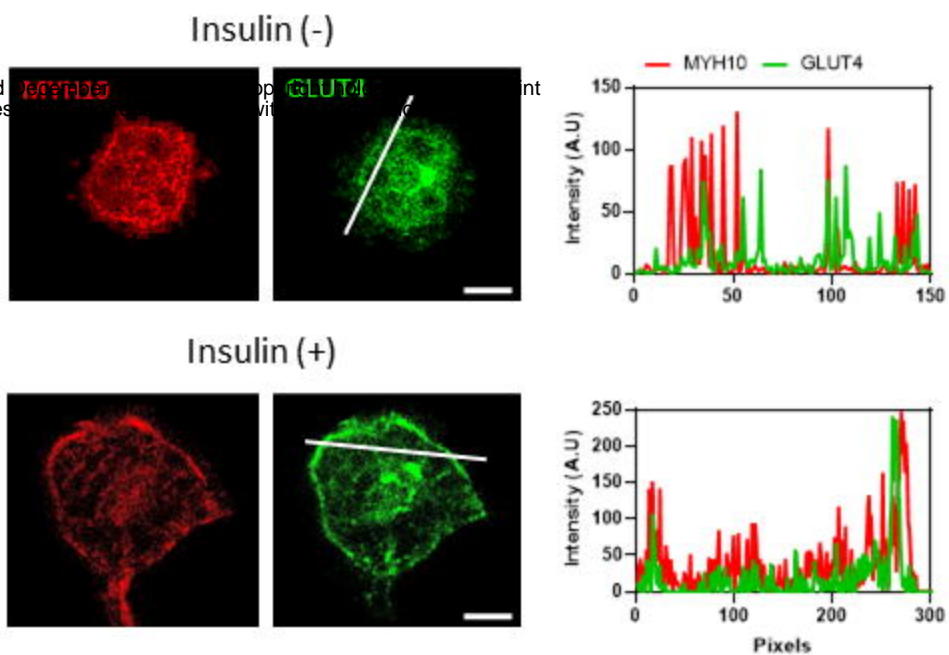**C**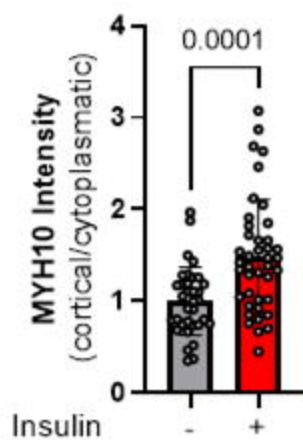**D**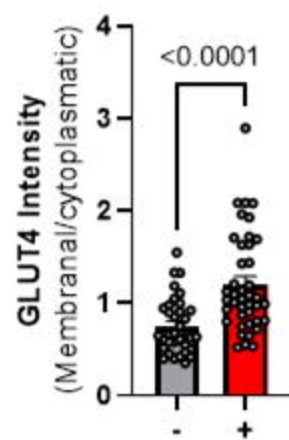**E**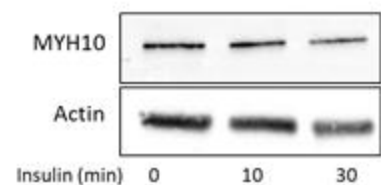**F**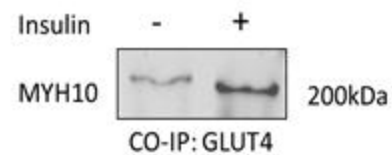

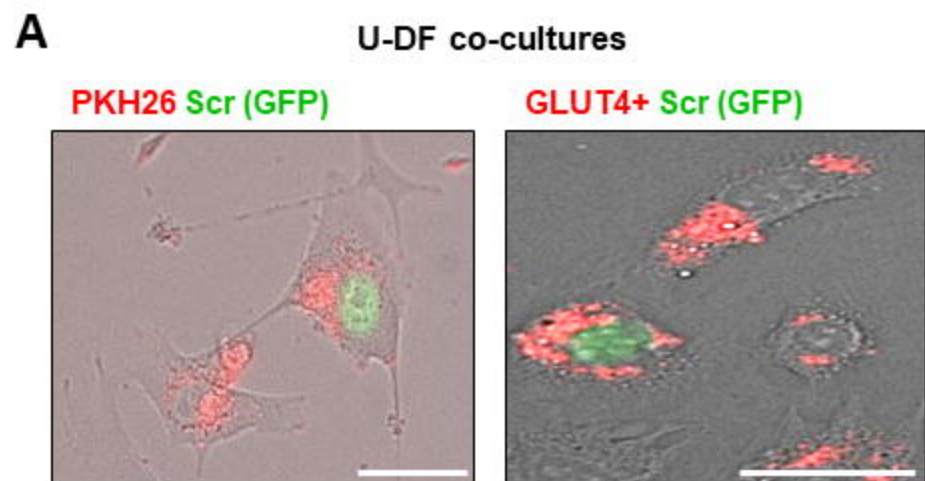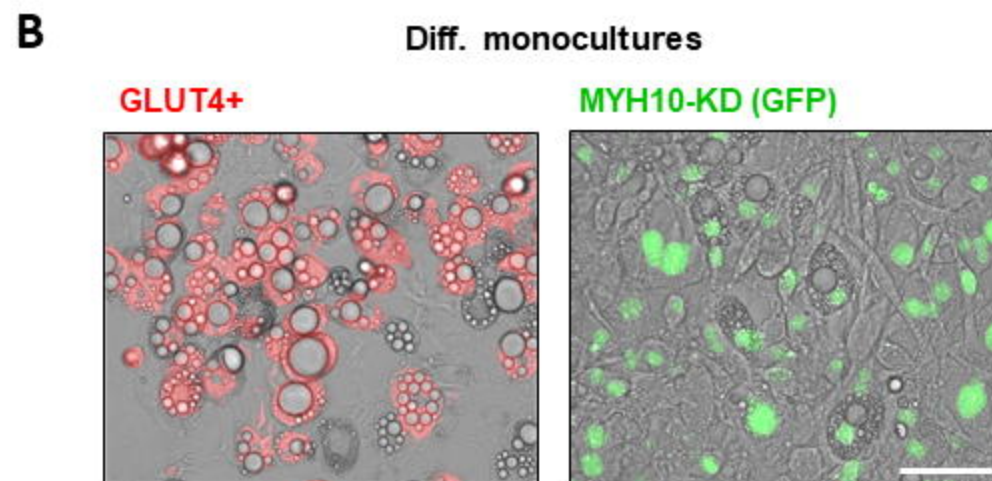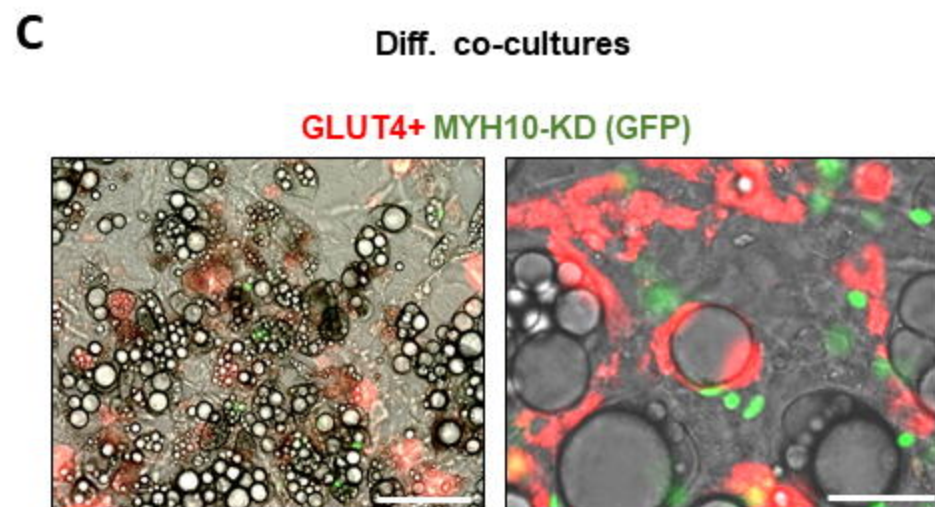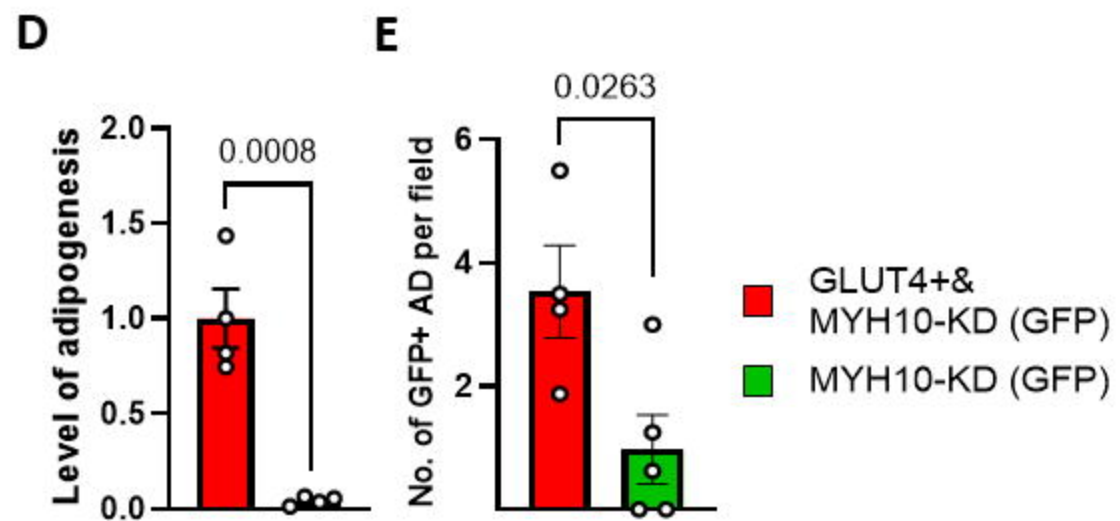

A

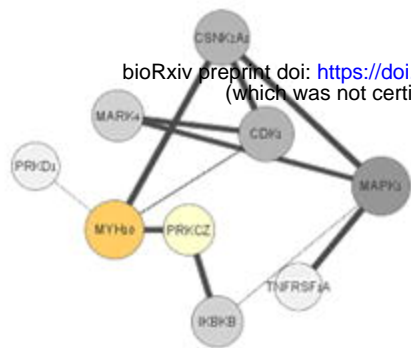

bioRxiv preprint doi: <https://doi.org/10.1101/2021.12.07.471535>; this version posted December 7, 2021. The copyright holder for this preprint (which was not certified by peer review) is the author/funder. All rights reserved. No reuse allowed without permission.

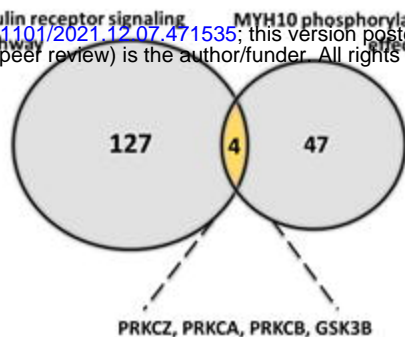

B

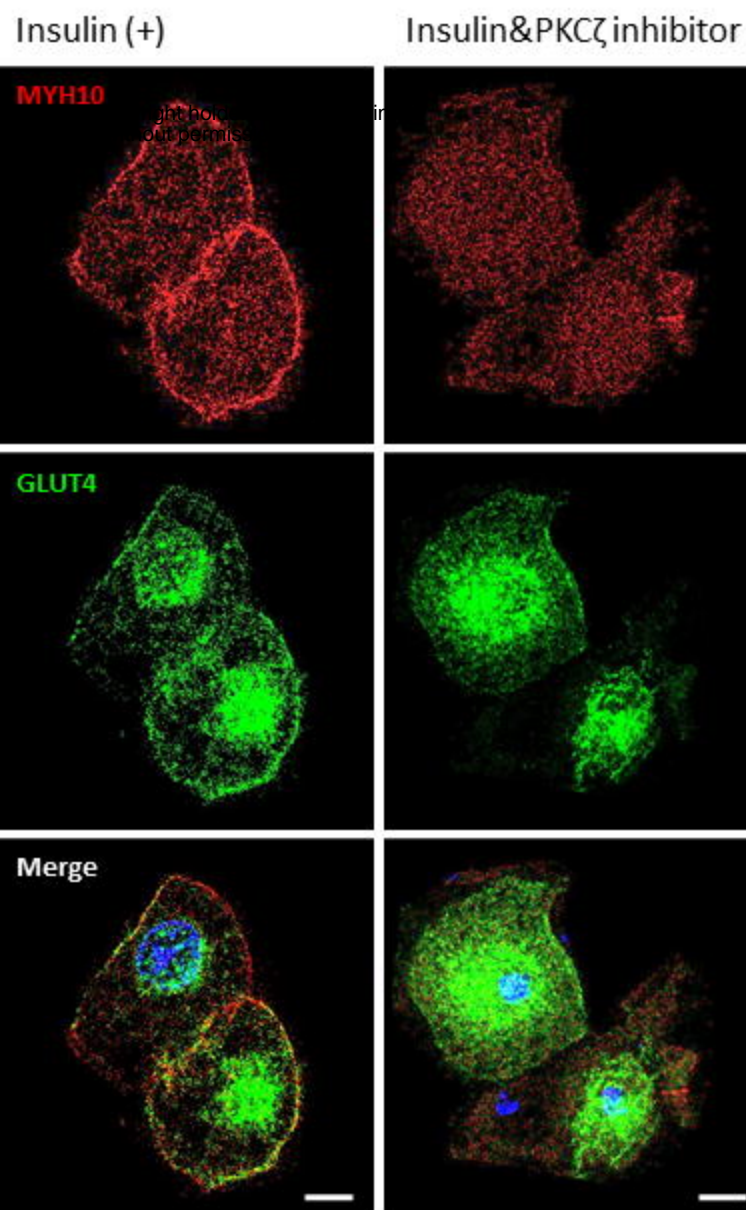

C

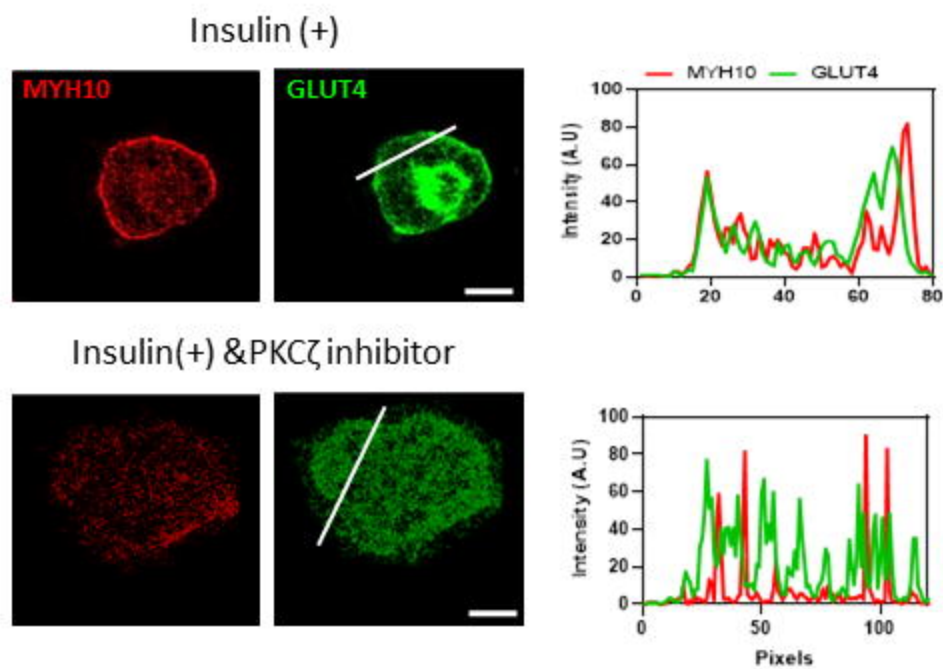

D

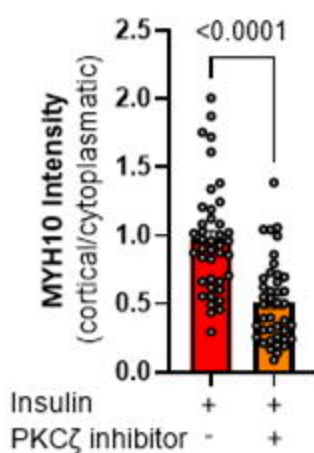

E

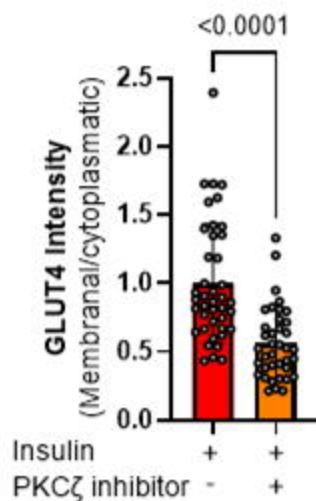

F

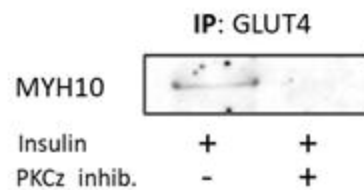

G

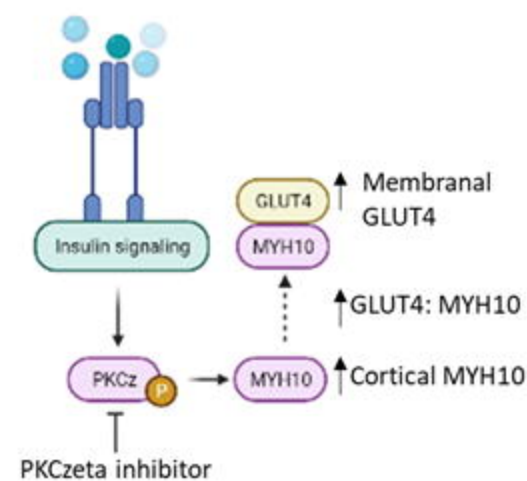

Source: https://www.biorxiv.org/content/10.1101/2021.12.07.471535v1.full.pdf
